# Supplementary material for: Orbital hybridization of donor and acceptor to enhance the conductivity of mixed-stack complexes
Source: PubMed Central journal article supplement (PMC11021477; doi:10.1038/s41467-024-47298-1), 2024-04-16
Supplement: 41467_2024_47298_MOESM1_ESM.pdf [file 41467_2024_47298_MOESM1_ESM.pdf]

## Supplementary Information

### **Orbital hybridization of donor and acceptor to enhance the conductivity of mixed-stack complexes**

Tomoko Fujino,\*<sup>1</sup> Ryohei Kameyama,<sup>1</sup> Kota Onozuka,<sup>1</sup> Kazuki Matsuo,<sup>1</sup> Shun Dekura,<sup>1</sup> Tatsuya Miyamoto,<sup>2</sup> Zijing Guo,<sup>2</sup> Hiroshi Okamoto,<sup>2</sup> Toshikazu Nakamura,<sup>3</sup> Kazuyoshi Yoshimi,<sup>1</sup> Shunsuke Kitou,<sup>2</sup> Taka-hisa Arima,<sup>2,4</sup> Hiroyasu Sato,<sup>5</sup> Kaoru Yamamoto,<sup>6</sup> Akira Takahashi,<sup>7</sup> Hiroshi Sawa,<sup>8</sup> Yuiga Nakamura,<sup>9</sup> Hatsumi Mori\*<sup>1</sup>

<sup>1</sup>The Institute for Solid State Physics, The University of Tokyo, 5-1-5 Kashiwanoha, Kashiwa, Chiba 277-8581, Japan

<sup>2</sup>Department of Advanced Materials Science, The University of Tokyo, 5-1-5 Kashiwanoha, Kashiwa, Chiba 277-8561, Japan

<sup>3</sup>Institute for Molecular Science, 38 Nishigo-Naka, Myodaiji, Okazaki, Aichi 444-8585, Japan

<sup>4</sup>RIKEN Center for Emergent Matter Science (CEMS), Wako 351-0198, Japan

<sup>5</sup>Rigaku Corporation, 3-9-12 Matsubara, Akishima, Tokyo 196-8666, Japan

<sup>6</sup>Department of Physics, Okayama University of Science, 1-1 Ridaicho, Kita-ku, Okayama 700-0005, Japan

<sup>7</sup>Graduate School of Engineering, Nagoya Institute of Technology, Gokiso-cho, Showa-ku, Nagoya, Aichi, 466-8555 Japan

<sup>8</sup>Department of Applied Physics, Nagoya University, Furo-cho, Chikusa-ku, Nagoya 464-8603, Japan

<sup>9</sup>Japan Synchrotron Radiation Research Institute (JASRI), SPring-8, 1-1-1, Kouto, Sayo-cho, Sayo-gun, Hyogo 679-5198, Japan

#### **\*Corresponding author**

Email: [fujino@issp.u-tokyo.ac.jp](mailto:fujino@issp.u-tokyo.ac.jp) (Tomoko Fujino) and [hmori@issp.u-tokyo.ac.jp](mailto:hmori@issp.u-tokyo.ac.jp) (Hatsumi Mori)

## Table of Contents

|                                                                                                                                                                                                    |           |
|----------------------------------------------------------------------------------------------------------------------------------------------------------------------------------------------------|-----------|
| <b>1. Structures of relevant donors and acceptors</b> .....                                                                                                                                        | <b>4</b>  |
| <b>Supplementary Fig. 1:</b> Structures of donors and acceptors involved in mixed-stack complexes.....                                                                                             | 4         |
| <b>2. Synthesis</b> .....                                                                                                                                                                          | <b>4</b>  |
| <b>Supplementary Note 1:</b> General synthetic procedure. ....                                                                                                                                     | 4         |
| <b>Supplementary Note 2:</b> Material sources.....                                                                                                                                                 | 5         |
| <b>Supplementary Note 3:</b> Synthesis of donor <b>2S</b> and charge-transfer salt <b>2S•BF<sub>4</sub></b> .....                                                                                  | 5         |
| <b>Supplementary Fig. 2:</b> Synthesis of <b>2S•BF<sub>4</sub></b> . ....                                                                                                                          | 6         |
| <b>3. Electrochemical properties</b> .....                                                                                                                                                         | <b>6</b>  |
| <b>Supplementary Note 4:</b> Cyclic voltammetry measurements. ....                                                                                                                                 | 6         |
| <b>Supplementary Fig. 3:</b> Cyclic voltammograms of donors and acceptors. ....                                                                                                                    | 7         |
| <b>4. Theoretical calculations for isolated molecules</b> .....                                                                                                                                    | <b>7</b>  |
| <b>Supplementary Note 5:</b> Calculation of molecular structures.....                                                                                                                              | 7         |
| <b>Supplementary Fig. 4:</b> Geometry and molecular orbitals of neutral <b>2S</b> . ....                                                                                                           | 8         |
| <b>Supplementary Fig. 5:</b> Calculated SOMO shapes of donors in a radical cation form and acceptors in a radical anion form. ....                                                                 | 9         |
| <b>Supplementary Fig. 6:</b> Calculated energy levels of orbitals for neutral donors and acceptors.....                                                                                            | 9         |
| <b>5. Single-crystal structures</b> .....                                                                                                                                                          | <b>10</b> |
| <b>Supplementary Note 6:</b> Single-crystal XRD measurements.....                                                                                                                                  | 10        |
| <b>Supplementary Table 1:</b> Crystallographic data for single-crystal <b>2S</b> and <b>2S•BF<sub>4</sub></b> . ....                                                                               | 12        |
| <b>Supplementary Fig. 7:</b> Single-crystal structure of <b>2S</b> at 293 K. ....                                                                                                                  | 13        |
| <b>Supplementary Fig. 8:</b> Single-crystal structure of <b>2S•BF<sub>4</sub></b> at 293 K.....                                                                                                    | 13        |
| <b>Supplementary Table 2:</b> Crystallographic data for single-crystal mixed-stack complexes.....                                                                                                  | 14        |
| <b>Supplementary Fig. 9:</b> Single-crystal structures of mixed-stack complexes at 300 K. ....                                                                                                     | 15        |
| <b>Supplementary Fig. 10:</b> Symmetry elements in the single-crystal structure of mixed-stack complexes at 300 K.....                                                                             | 15        |
| <b>Supplementary Fig. 11:</b> Single-crystal structures of donors in mixed-stack complexes at 300 K. ....                                                                                          | 16        |
| <b>Supplementary Fig. 12:</b> Single-crystal X-ray diffraction precession image of the $0\ K\ L$ plane in the reciprocal lattice of <b>2S–F<sub>4</sub></b> at 300 K.....                          | 16        |
| <b>Supplementary Fig. 13:</b> Single-crystal X-ray diffraction precession image of the $0\ K\ L$ plane of <b>2S–F<sub>4</sub></b> at 200 K. ....                                                   | 17        |
| <b>Supplementary Fig. 14:</b> Single-crystal X-ray diffraction precession images of the $H\ 0\ L$ (a) and $3\ K\ L$ (b) planes in the reciprocal lattice of <b>2S–F<sub>4</sub></b> at 300 K. .... | 17        |
| <b>Supplementary Fig. 15:</b> Single-crystal X-ray diffraction precession image of the $H\ 0\ L$ plane in the                                                                                      |           |

|                                                                                                                                                     |           |
|-----------------------------------------------------------------------------------------------------------------------------------------------------|-----------|
| reciprocal lattice of <b>2S–F<sub>4</sub></b> at 200 K.....                                                                                         | 18        |
| <b>Supplementary Fig. 16:</b> Temperature-dependence of single-crystal X-ray diffraction precession of <b>2S–F<sub>4</sub></b> .....                | 18        |
| <b>Supplementary Fig. 17:</b> Possible Models proposed for the molecular arrangement of <b>2S–F<sub>4</sub></b> superlattice observed at 200 K..... | 19        |
| <b>6. Theoretical calculations .....</b>                                                                                                            | <b>19</b> |
| <b>Supplementary Note 7:</b> Band and crystal orbital calculations.....                                                                             | 19        |
| <b>Supplementary Fig. 18:</b> Band structures of mixed-stack complexes.....                                                                         | 21        |
| <b>Supplementary Fig. 19:</b> Crystal orbitals of mixed-stack complexes.....                                                                        | 22        |
| <b>Supplementary Fig. 20:</b> Wannier interpolation bands and band dispersion.....                                                                  | 23        |
| <b>Supplementary Fig. 21:</b> The maximally localized Wannier function of <b>2O–F<sub>4</sub></b> in a cell.....                                    | 24        |
| <b>Supplementary Fig. 22:</b> The maximally localized Wannier function of <b>2O–F<sub>2</sub></b> in a cell.....                                    | 24        |
| <b>Supplementary Fig. 23:</b> The maximally localized Wannier function of <b>2O–F<sub>2</sub></b> in a cell.....                                    | 24        |
| <b>Supplementary Fig. 24:</b> The maximally localized Wannier function of <b>2S–F<sub>4</sub></b> in a cell.....                                    | 25        |
| <b>Supplementary Fig. 25:</b> The maximally localized Wannier function of <b>2S–F<sub>2</sub></b> (major occupancy) in a cell.....                  | 25        |
| <b>Supplementary Fig. 26:</b> The maximally localized Wannier function of <b>2S–F<sub>2</sub></b> (minor occupancy) in a cell.....                  | 25        |
| <b>Supplementary Fig. 27:</b> Labels for <i>t</i> values for mixed-stack complexes.....                                                             | 26        |
| <b>Supplementary Table 3:</b> Transfer integrals for mixed-stack complexes..                                                                        | 27        |
| <b>Supplementary Fig. 28:</b> Effective direct Coulomb interactions in a cell of <b>2O–F<sub>4</sub></b> .....                                      | 27        |
| <b>Supplementary Fig. 29:</b> Effective direct Coulomb interactions in a cell of <b>2O–F<sub>2</sub></b> in the major occupancy.....                | 28        |
| <b>Supplementary Fig. 30:</b> Effective direct Coulomb interactions in a cell of <b>2O–F<sub>2</sub></b> in the minor occupancy.....                | 28        |
| <b>Supplementary Fig. 31:</b> Effective direct Coulomb interactions in a cell of <b>2S–F<sub>4</sub></b> .....                                      | 29        |
| <b>Supplementary Fig. 32:</b> Effective direct Coulomb interactions in a cell of <b>2S–F<sub>2</sub></b> in the major occupancy.....                | 29        |
| <b>Supplementary Fig. 33:</b> Effective direct Coulomb interactions in a cell of <b>2S–F<sub>2</sub></b> in the minor occupancy.....                | 30        |
| <b>7. Optical properties.....</b>                                                                                                                   | <b>30</b> |
| <b>Supplementary Note 8:</b> Optical reflection spectroscopy measurements .....                                                                     | 30        |
| <b>Supplementary Fig. 34:</b> Reflectivity spectra of mixed-stack complexes.....                                                                    | 32        |
| <b>Supplementary Fig. 35:</b> Temperature-dependent polarized reflectivity spectra.....                                                             | 33        |

|                                                                                                                                                                                                 |           |
|-------------------------------------------------------------------------------------------------------------------------------------------------------------------------------------------------|-----------|
| <b>Supplementary Table 4:</b> The fundamental molecular vibration modes of donor and acceptor molecules estimated in the relevant ionicity calculated from their neutral and ionic states. .... | 34        |
| <b>Supplementary Table 5:</b> Parameters used in the calculation of the vibronic spectrum of <b>2S-F<sub>4</sub></b> . ....                                                                     | 34        |
| <b>8. Electrical conductivities</b> .....                                                                                                                                                       | <b>35</b> |
| <b>Supplementary Note 9:</b> Electrical resistivity measurements .....                                                                                                                          | 35        |
| <b>Supplementary Fig. 36:</b> <i>I-V</i> curve of mixed-stack complexes. ....                                                                                                                   | 35        |
| <b>9. Magnetic properties</b> .....                                                                                                                                                             | <b>36</b> |
| <b>Supplementary Note 10:</b> ESR measurements .....                                                                                                                                            | 36        |
| <b>Supplementary Fig. 37:</b> Temperature-dependent ESR spectra of <b>2S-F<sub>4</sub></b> . ....                                                                                               | 37        |
| <b>Supplementary Fig. 38:</b> Enlarged ESR spectra of <b>2S-F<sub>4</sub></b> . ....                                                                                                            | 38        |
| <b>Supplementary Fig. 39:</b> Parameters for ESR spectra of mixed-stack complexes.....                                                                                                          | 39        |
| <b>Supplementary Note 11:</b> Static magnetic susceptibility measurements .....                                                                                                                 | 40        |
| <b>Supplementary Fig. 40:</b> Temperature-dependent susceptibility of mixed-stack complexes.....                                                                                                | 40        |
| <b>10. NMR spectra</b> .....                                                                                                                                                                    | <b>41</b> |
| <b>Supplementary Fig. 41:</b> <sup>1</sup> H NMR spectrum of <b>2S</b> in CDCl <sub>3</sub> . ....                                                                                              | 41        |
| <b>Supplementary Fig. 42:</b> <sup>13</sup> C NMR spectrum of <b>2S</b> in CDCl <sub>3</sub> . ....                                                                                             | 42        |
| <b>11. Coordinates of optimized structures</b> .....                                                                                                                                            | <b>43</b> |
| <b>Supplementary Table 6:</b> The geometry of optimized structure for neutral <b>2S</b> . ....                                                                                                  | 43        |
| <b>Supplementary Table 7:</b> The geometry of neutral <b>2S</b> with constrained torsional angle $ \theta_1 $ to be 180°. ....                                                                  | 44        |
| <b>Supplementary Table 8:</b> The geometry of optimized structure for radical cation <b>2S<sup>+</sup></b> . ....                                                                               | 46        |
| <b>Supplementary Table 9:</b> The geometry of optimized structure for neutral <b>F<sub>4</sub></b> . ....                                                                                       | 47        |
| <b>Supplementary Table 10:</b> The geometry of optimized structure for radical anion <b>F<sub>4</sub><sup>-</sup></b> . ....                                                                    | 48        |
| <b>Supplementary Table 11:</b> The geometry of optimized structure for neutral <b>F<sub>2</sub></b> . ....                                                                                      | 49        |
| <b>Supplementary Table 12:</b> The geometry of optimized structure for radical anion <b>F<sub>2</sub><sup>-</sup></b> . ....                                                                    | 50        |
| <b>12. Supplementary references</b> .....                                                                                                                                                       | <b>51</b> |

## 1. Structures of relevant donors and acceptors

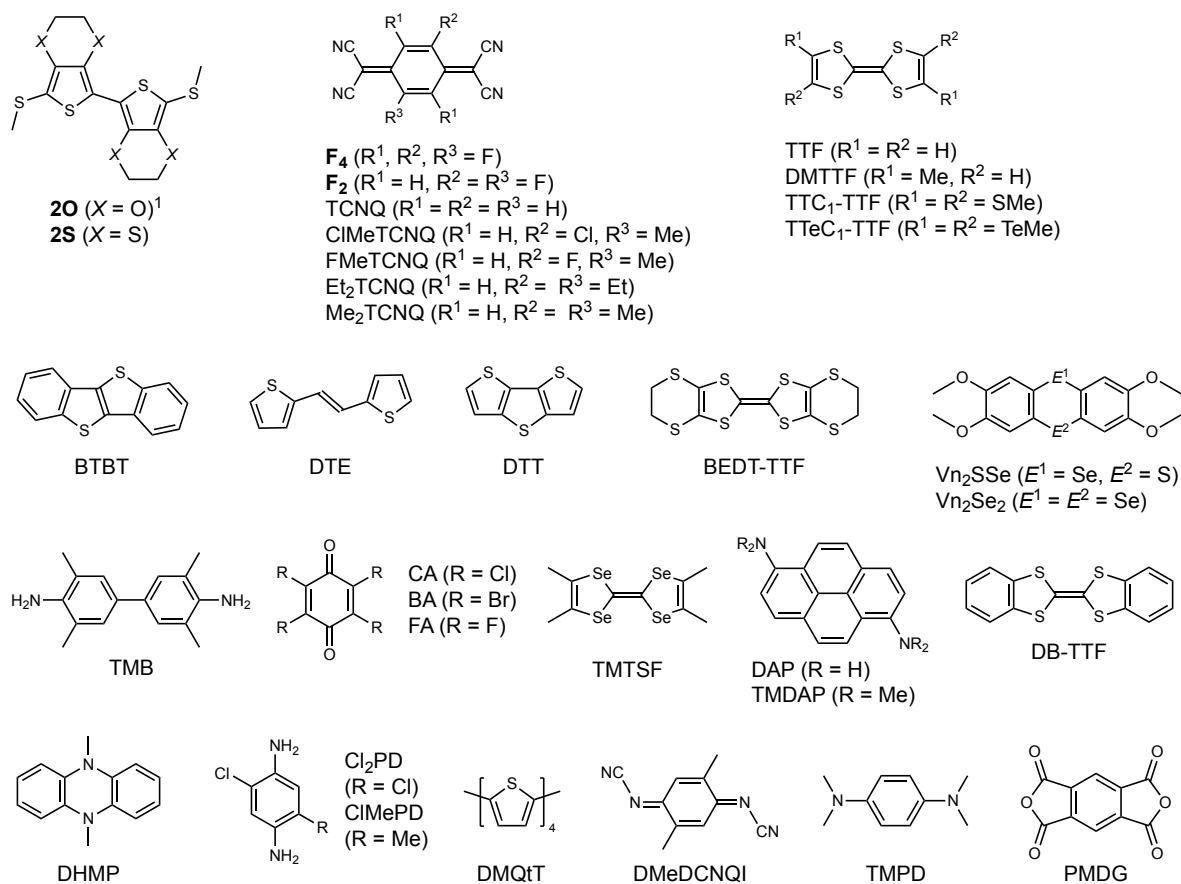

**Supplementary Fig. 1: Structures of donors and acceptors involved in mixed-stack complexes.** The Combinations of neutral donors<sup>1</sup> and acceptors are shown in Figs. 1b and 2.

## 2. Synthesis

### Supplementary Note 1: General synthetic procedure.

All the reactions were carried out under an inert atmosphere of argon except for chemical oxidation reactions for the synthesis of mixed-stack complexes. Analytical thin-layer chromatography (TLC) was performed on a glass plate coated with silica gel (230–400 mesh, 0.25 mm thickness) containing a fluorescent indicator (silica gel 60F<sub>254</sub>, Merck). Preparative GPC was performed on JAIGEL 1HR and 2HR polystyrene columns (Japan Analytical Industry Co., Ltd.) with chloroform as the eluent.

### Supplementary Note 2: Material sources.

The following reagents were purchased from commercial suppliers and used as received: *N*-bromosuccinimide (NBS, Wako Pure Chemical Industries), dichloromethane (superdehydrated, Wako Pure Chemical Industries), *n*-butyllithium (<sup>*n*</sup>BuLi, 1.6 M in hexane, Kanto Chemical), tetrahydrofuran (THF, superdehydrated, stabilized with 2,6-di-*t*-butyl-*p*-cresol, Wako Pure Chemical Industries), dimethyl disulfide (Wako Pure Chemical Industries), 2,3,5,6-tetrafluoro-7,7,8,8-tetracyanoquinodimethane (**F**<sub>4</sub>, Tokyo Chemical Industry), 2,5-difluoro-7,7,8,8-tetracyanoquinodimethane (**F**<sub>2</sub>, Tokyo Chemical Industry), tetra-*n*-butylammonium tetrafluoroborate (<sup>*n*</sup>Bu<sub>4</sub>N•BF<sub>4</sub>, Tokyo Chemical Industry), tetra-*n*-butylammonium hexafluorophosphate (<sup>*n*</sup>Bu<sub>4</sub>N•PF<sub>6</sub>, Aldrich), carbon paste (XC-12, DO-TITE, Fujikura Kasei), and silver paste (D-500, DOTITE, Fujikura Kasei). 2,2'-Bi(3,4-ethylenedithiophene) was synthesized according to the literature.<sup>2</sup>

### Supplementary Note 3: Synthesis of donor **2S** and charge-transfer salt **2S**•BF<sub>4</sub>.

A donor **2S** was designed to have methylthio groups at its ends. These groups are small enough not interfere with the  $\pi$ -stacking of the molecule during crystallization, similar to **2O**.<sup>1</sup> Initially, we attempted to dimerize unsubstituted or dibrominated monomers, followed by lithiation and methylthio substitution.<sup>1,3</sup> However, these attempts resulted in low yields. Therefore, we modified the synthesis route by starting with bromination of unsubstituted dimer **1**, followed by lithiation and methyl thiolation, as shown in Fig. 3a and Methods section in the text.

A donor **2S** (4.3 mg, 10  $\mu$ mol) was placed in one side of an H-shaped cell equipped with a glass filter, and <sup>*n*</sup>Bu<sub>4</sub>N•BF<sub>4</sub> (2  $\times$  10 mg) was placed in each side of the cell, respectively. The compounds were dissolved in acetonitrile (total 10 mL) under ultrasonic irradiation for >10 min. Two pre-annealed platinum electrodes were inserted into each side of the cell, and the cell was kept at 30 °C for 2 h. Then, a constant current of 0.2  $\mu$ A was applied to the solution at the temperature for at least 2 d to afford black needle-like crystals of **2S**•BF<sub>4</sub> (typical size:  $\sim$ 300  $\times$   $\sim$ 30  $\times$   $\sim$ 30  $\mu$ m<sup>3</sup>; Fig. 3b and Supplementary Fig. 2). The crystal structure and

chemical composition were identified by the single-crystal X-ray structural analysis (Supplementary Table 1).

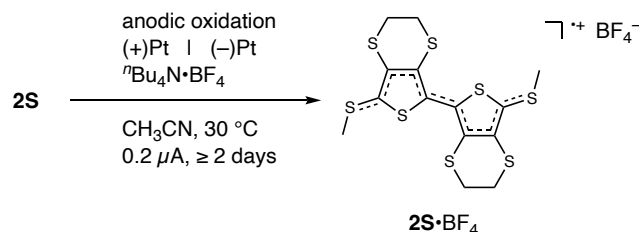

**Supplementary Fig. 2: Synthesis of 2S•BF<sub>4</sub>.**

### 3. Electrochemical properties

#### Supplementary Note 4: Cyclic voltammetry measurements.

By using a silver-silver chloride electrode (Ag/AgCl/1 M KCl) as the reference electrode, we determined  $E_{\text{ox1}}$  and  $E_{\text{ox2}}$  values as the average of the potentials at the peak tops of the first and second oxidation and reduction processes<sup>4</sup> to be 0.622 and 0.951 V for **2O**, 0.805 and 1.05 V for **2S**, respectively (Table 1 and Supplementary Fig. 3). The HOMO levels were estimated from the first half-wave oxidation potentials by assuming the reference energy level of ferrocene/ferrocenium ( $\text{Fc}/\text{Fc}^+ = 0.486 \text{ V vs. Ag/AgCl/1 M KCl}$  measured under the identical conditions) to be 4.8 eV from the vacuum levels,<sup>5</sup> to be -4.94 and -5.13 eV for **2O** and **2S**, respectively. Likewise,  $E_{\text{red1}}$  and  $E_{\text{red2}}$  of the first and second reduction processes were 0.652/0.024 V for **F<sub>4</sub>**, 0.417/-0.202 V for **F<sub>2</sub>**, respectively; the LUMO levels were determined to be -4.98 and -4.74 eV for **F<sub>4</sub>** and **F<sub>2</sub>**, respectively.

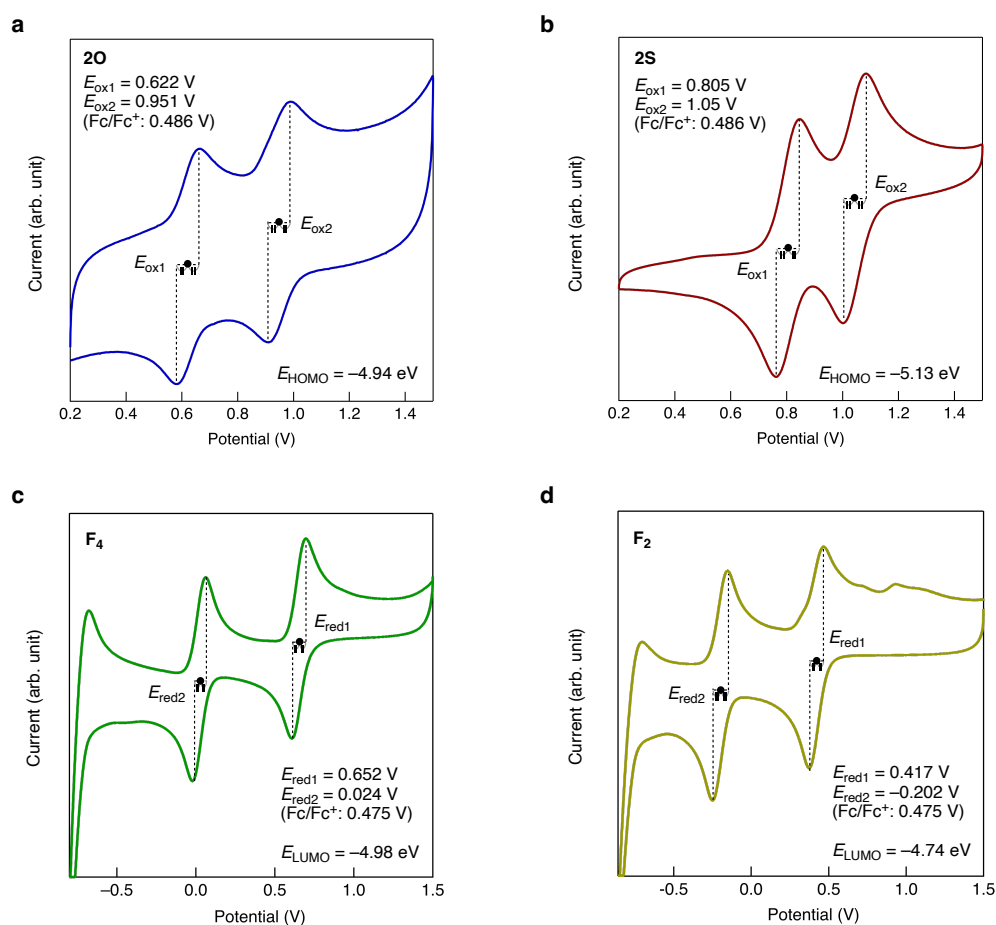

**Supplementary Fig. 3: Cyclic voltammograms of donors and acceptors. a, 2O. b, 2S. c, F<sub>4</sub>. d, F<sub>2</sub>.** The HOMO and LUMO levels were determined  $E_{\text{ox}1}$  and  $E_{\text{red}1}$ , respectively (Ag/AgCl/1 M KCl).

#### 4. Theoretical calculations for isolated molecules

##### Supplementary Note 5: Calculation of molecular structures.

We calculated the energy levels and shapes of orbitals for donors and acceptors after structural optimization on the Gaussian09 program<sup>6</sup> at the density functional theory (DFT) level with the (unrestricted) B3LYP functional, the gradient correction of the exchange functional by Becke<sup>7,8</sup> and the correlation functional by Lee, Yang and Parr<sup>9</sup> and the 6-31G(d) split valence plus polarization basis set.<sup>10,11,12</sup> The Cartesian coordinates for the optimized geometries are shown in Supplementary Tables 6 and 8–12. The calculated shapes of HOMO for neutral **2S**, SOMO for one-electron-oxidized donors (**2O**<sup>+</sup> and **2S**<sup>+</sup>), and SOMO for one-electron-reduced acceptors (**F<sub>4</sub>**<sup>-</sup> and **F<sub>2</sub>**<sup>-</sup>) are visualized on GaussView 5.0<sup>13</sup> in Supplementary Figs. 4 and 5. The optimized structure of neutral **2S** showed a twisting angle between two thiophene rings (i.e., a



torsional angle  $|\theta_1|$  ( $C^1-C^2-C^3-C^4$ ) =  $90.7^\circ$  in Supplementary Fig. 4a; the calculated geometry was shown in Supplementary Table 6), mainly due to the steric repulsion between close two S atoms,<sup>14</sup> while that of **2O** is nearly planar, as observed in the single-crystal structure.<sup>1</sup> In contrast, the most stable conformer of **2S**<sup>+</sup> was predicted to be planar (calculated  $|\theta_1|$  =  $161^\circ$  in Fig 4b and Supplementary Fig. 5b), like **2O**<sup>+</sup><sup>1</sup> (calculated  $|\theta_1|$  =  $180^\circ$  in Supplementary Fig. 5a). These planar structures of donors in the oxidized states are appropriate for  $\pi$ -stacking with planar acceptor molecules **F**<sub>4</sub> and **F**<sub>2</sub> in the reduced states (Fig. 4b and Supplementary Fig. 5c,d) for the formation of mixed-stack complexes. To ignore the contribution of the twisting and compare the energy levels of the neutral donor and acceptor before the complexation, the orbital energy levels of the planarized **2S** were calculated using a transient structure with the torsional angle  $|\theta_1|$  to be  $180^\circ$ ; the calculated geometry was shown in Supplementary Table 7. The calculated energy levels of neutral **2O**, **2S** with  $|\theta_1|$  of  $180^\circ$ , **F**<sub>4</sub>, and **F**<sub>2</sub> are shown in Fig. 4a and Supplementary Fig. 6. On the other hand, these calculations indicate that the C–S bonds between the C atoms at the 5-position of thiophene and the S atoms of the terminal MeS group of neutral **2O**<sup>1</sup> and **2S** oriented orthogonal to the  $\pi$ -plane (i.e., calculated  $|\theta_2|$  of **2S** =  $87.3^\circ$  in Supplementary Fig. 4a); while the bonds in **2O**<sup>+</sup><sup>1</sup> and **2S**<sup>+</sup> are coplanar to the  $\pi$ -planes (calculated  $|\theta_2|$  =  $180^\circ$ ; Supplementary Fig. 5a,b), as observed in the single-crystal of the charge-transfer salt **2O**•**BF**<sub>4</sub><sup>1</sup> and **2S**•**BF**<sub>4</sub> (observed  $|\theta_2|$  =  $178.7(3)^\circ$  in Supplementary Fig. 8). The average periodicity of horizontally nodal orbitals<sup>15</sup> of **2O**<sup>+</sup>, **2S**<sup>+</sup>, **F**<sub>4</sub><sup>-</sup>, and **F**<sub>2</sub><sup>-</sup> were calculated using the S–S distances of methylthio groups for **2O**<sup>+</sup> and **2S**<sup>+</sup> and N–N distances of the cyano groups for **F**<sub>4</sub><sup>-</sup> for **F**<sub>2</sub><sup>-</sup> by dividing the number of the nodes.

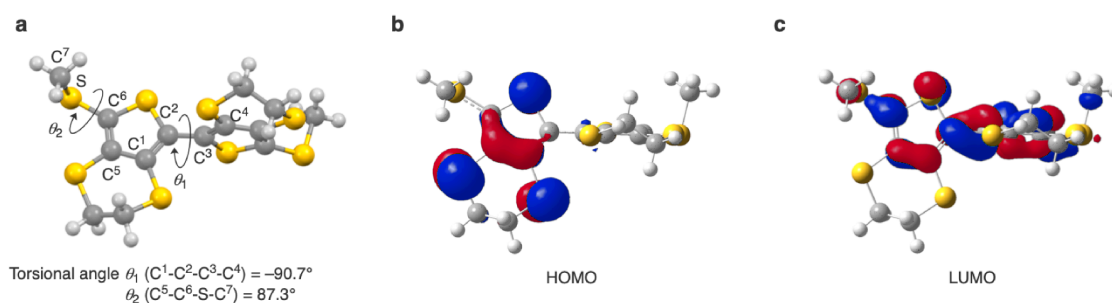

**Supplementary Fig. 4: Geometry and molecular orbitals of neutral 2S.** a, The optimized structure shown with the torsional angles  $\theta_1$  ( $C^1-C^2-C^3-C^4$ ) and  $\theta_2$  ( $C^5-C^6-S-C^7$ ). b, Calculated HOMO shape. c,

Calculated LUMO shape. Atoms were colored as follows; yellow: sulfur; gray: carbon; white: hydrogen.

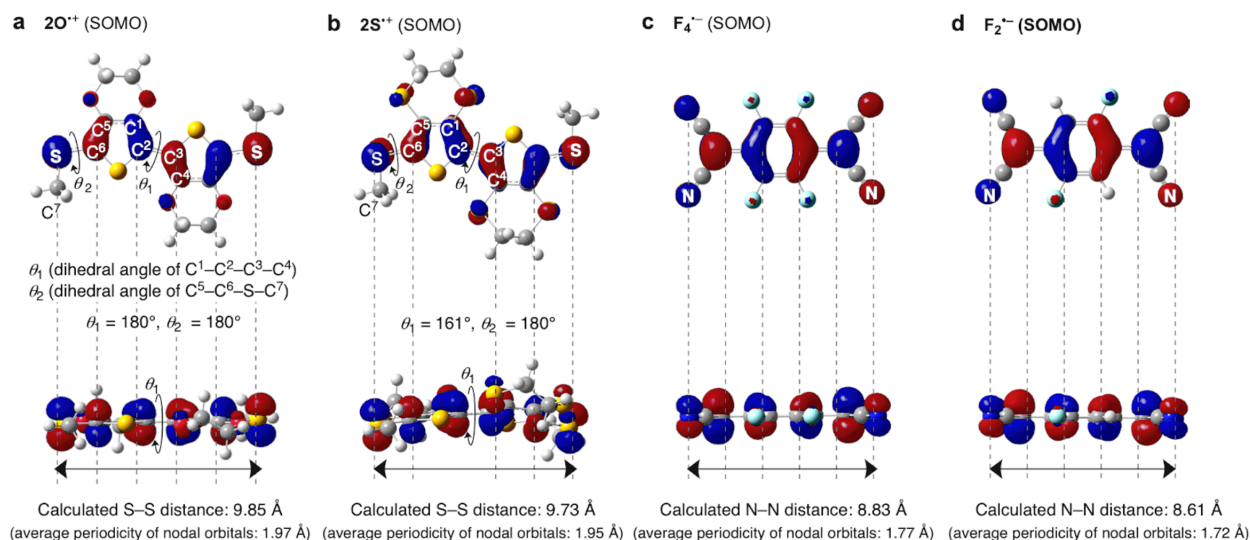

**Supplementary Fig. 5: Calculated SOMO shapes of donors in a radical cation form and acceptors in a radical anion form. a**, Radical cation  $2O^+$ . **b**, Radical cation  $2S^+$ . **c**, Radical anion  $F_4^-$ . **d**, Radical anion  $F_2^-$ . Atoms were colored as follows; red: oxygen; yellow: sulfur; gray: carbon; light green: fluorine; white: hydrogen. The calculated S-S and N-N distances and the average periodicity of horizontally nodal orbitals are shown.

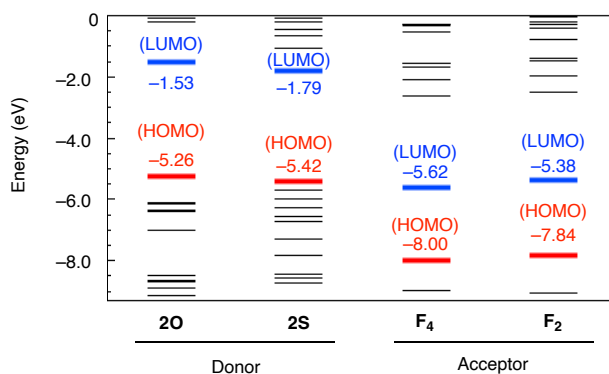

**Supplementary Fig. 6: Calculated energy levels of orbitals for neutral donors and acceptors.** In the calculation of  $2S$ , the dihedral angle  $|\theta_1|$  between two planes was constrained at  $180^\circ$ . The levels of HOMO of  $2O$  and  $2S$  donors and LUMO of  $F_4$  and  $F_2$  acceptors were comparable, enhancing their hybridization.

## 5. Single-crystal structures

### Supplementary Note 6: Single-crystal XRD measurements.

The in-house single-crystal X-ray diffractometer (XRD) analyses of a neutral donor **2S** (Supplementary Fig. 7 and Supplementary Table 1) and a charge-transfer salt **2S**•BF<sub>4</sub> (Supplementary Fig. 8 and Supplementary Table 1) were performed using a Rigaku MercuryII CCD X-ray diffractometer (Mo *K*<sub>α</sub>, X-ray wavelength  $\lambda = 0.71073$  Å). The structures were analyzed by a direct method (SHELXT<sup>16</sup> version 2018/2) and refined with full-matrix least-squares technique (SHELXL version 2018/3) using an Olex2<sup>17</sup>-1.2 (OlexSys) software. Anisotropic thermal parameters were applied to all non-hydrogen atoms. The hydrogen atoms were generated geometrically. The single-crystal structure of neutral **2S** consists of crystallographically-independent half molecules that possess disordered ethylene groups **2S** with the occupancy of 72:28 (Supplementary Fig. 7). The single-crystal structure of charge-transfer salt **2S**•BF<sub>4</sub> consists of crystallographically-independent half molecules that possess disordered ethylene groups **2S** with the occupancy of 67:33 and fluorine atoms with the occupancy of 52:48 (Supplementary Fig. 8).

The synchrotron single-crystal XRD analyses of mixed-stack complexes at 300 K (Supplementary Figs. 9–12, 14, and Supplementary Table 2) and **2S**–F<sub>4</sub> at 200 K (Supplementary Figs. 13 and 15) were performed and on BL02B1 (X-ray wavelength  $\lambda = 0.30960$  Å) at a synchrotron facility SPring-8 in Japan.<sup>18</sup> A N<sub>2</sub>-gas-blowing device was employed for the low-temperature measurements. A two-dimensional detector CdTe PILATUS was used to record the diffraction pattern. The intensities of Bragg reflections were collected by CrysAlisPro program.<sup>19</sup> Intensities of equivalent reflections were averaged, and the structural parameters were refined by using Jana2006.<sup>20</sup> Fluorine atoms of **2O**–F<sub>2</sub> and **2S**–F<sub>2</sub> were positionally disordered with the occupancy of 94:6 and 86:14 (Supplementary Fig. 9b,d). The bond lengths analyses are shown in Fig. 5. In the synchrotron radiation experiments at 300 K, we observed significant X-ray diffuse scattering along the *c*<sup>\*</sup>-axis and *b*<sup>\*</sup>+*c*<sup>\*</sup>-direction (Supplementary Fig. 14). This scattering can be induced by the  $\pi$ -dimerization fluctuation between donors and acceptors along the *a*-axis (i.e., the  $\pi$ -stacking direction) in columns, possibly resulting in the intercolumnar interactions to fluctuate the molecular arrangement along

the  $c$ -axis. The scattering may be a precursor phenomenon for the one-dimensional nature as identified for TTF-CA.<sup>21</sup> Upon cooling to 200 K, the X-ray diffuse scattering disappeared (Supplementary Figs. 15 and 16), possibly due to the  $\pi$ -dimerization. Considering the magnetic characteristics that showed paramagnetic to non-magnetic transition at 282 K, this disappearance may be related to spin-Peierls-like  $\pi$ -dimerization, similar to those observed in one-dimensional charge-transfer complexes.<sup>22</sup> The disappearance supports the X-ray diffuse scattering occurring at 300 K is a precursor phenomenon prior to  $\pi$ -dimerization. The XRD at 200 K showed a superlattice with dimensions of  $a \times 2b \times 2c$  (Supplementary Fig. 13). The superlattice peaks are observed only at  $k + l = 2n$  in  $a \times 2b \times 2c$  lattice. These peaks correspond to the reflection conditions of the A-base center. The observation enabled us to propose a possible dimer model for the molecular arrangement, as shown in Supplementary Fig. 17. The models suggest a stripe pattern of the  $\pi$ -dimerization, which should belong to a space group of  $P1$  without an inversion center.

**Supplementary Table 1: Crystallographic data for single-crystal 2S and 2S•BF<sub>4</sub>.**

| Compounds                                             | 2S                                             | 2S•BF <sub>4</sub>                                             |
|-------------------------------------------------------|------------------------------------------------|----------------------------------------------------------------|
| Temperature / K                                       | 293                                            | 293                                                            |
| Formula                                               | C <sub>14</sub> H <sub>14</sub> S <sub>8</sub> | C <sub>14</sub> H <sub>14</sub> S <sub>8</sub> BF <sub>4</sub> |
| Formula weight                                        | 438.73                                         | 525.54                                                         |
| Crystal system                                        | <i>monoclinic</i>                              | <i>monoclinic</i>                                              |
| Space group                                           | <i>P2<sub>1</sub>/n</i> (#14)                  | <i>C2/c</i> (#15)                                              |
| <i>a</i> / Å                                          | 8.1995(4)                                      | 15.416(3)                                                      |
| <i>b</i> / Å                                          | 13.2416(8)                                     | 21.8312(15)                                                    |
| <i>c</i> / Å                                          | 8.6626(5)                                      | 7.6027(13)                                                     |
| <i>α</i> / deg.                                       | 90                                             | 90                                                             |
| <i>β</i> / deg.                                       | 109.929(6)                                     | 127.78(3)                                                      |
| <i>γ</i> / deg.                                       | 90                                             | 90                                                             |
| <i>V</i> / Å <sup>3</sup>                             | 884.21(9)                                      | 2022.4(8)                                                      |
| <i>Z</i>                                              | 2                                              | 4                                                              |
| <i>D<sub>calc</sub></i> / g cm <sup>-3</sup>          | 1.648                                          | 1.726                                                          |
| <i>R<sub>int</sub></i>                                | 0.0165                                         | 0.0330                                                         |
| <i>R</i> <sub>1</sub> ( <i>I</i> > 2.00σ( <i>I</i> )) | 0.0241                                         | 0.0387                                                         |
| <i>wR</i> <sub>2</sub> (all reflections)              | 0.0656                                         | 0.0950                                                         |
| GOF                                                   | 1.040                                          | 1.029                                                          |
| CCDC                                                  | 2264341                                        | 2264342                                                        |

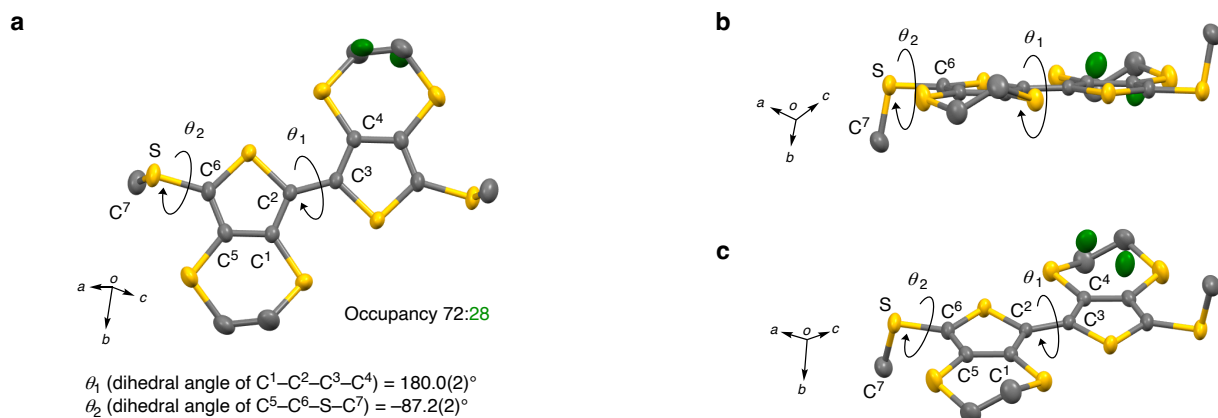

**Supplementary Fig. 7: Single-crystal structure of 2S at 293 K.** The structure is displayed in ORTEP (50% thermal ellipsoid) drawing along the  $\pi$ -stacking direction (**a**), from perpendicular direction to the  $\pi$ -plane of the molecule (**b**), and along the slanting direction to the  $\pi$ -plane (**c**). Disordered carbon atoms in the minor occupancy were colored in green. Other carbon and sulfur atoms were colored in gray and yellow, respectively. Hydrogens were omitted for clarity.

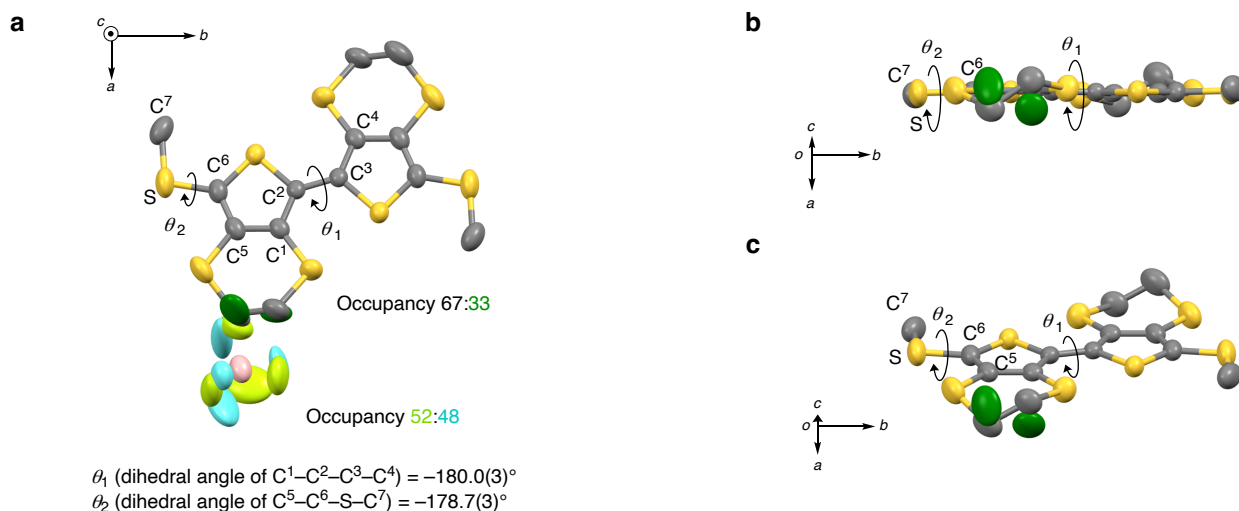

**Supplementary Fig. 8: Single-crystal structure of 2S·BF<sub>4</sub> at 293 K.** The structure is displayed in ORTEP (50% thermal ellipsoid) drawing along the  $\pi$ -stacking direction (**a**), from perpendicular direction to the  $\pi$ -plane of the molecule (**b**), and along the slanting direction to the  $\pi$ -plane (**c**). Disordered carbon and fluorine atoms in the minor occupancy were colored in green and aqua, respectively. Other carbon, fluorine, sulfur, and boron atoms were colored in gray, light green, yellow, and orange, respectively. Hydrogens and anions were omitted for clarity (**b,c**).

**Supplementary Table 2: Crystallographic data for single-crystal mixed-stack complexes.**

| Compounds                                             | 2O–F <sub>4</sub>                                                                           | 2O–F <sub>2</sub>                                                                           | 2S–F <sub>4</sub>                                                            | 2S–F <sub>2</sub>                                                            |
|-------------------------------------------------------|---------------------------------------------------------------------------------------------|---------------------------------------------------------------------------------------------|------------------------------------------------------------------------------|------------------------------------------------------------------------------|
| Temperature / K                                       | 300                                                                                         | 300                                                                                         | 300                                                                          | 300                                                                          |
| Formula                                               | C <sub>26</sub> H <sub>14</sub> F <sub>4</sub> N <sub>4</sub> O <sub>4</sub> S <sub>4</sub> | C <sub>26</sub> H <sub>16</sub> F <sub>2</sub> N <sub>4</sub> O <sub>4</sub> S <sub>4</sub> | C <sub>26</sub> H <sub>14</sub> F <sub>4</sub> N <sub>4</sub> S <sub>8</sub> | C <sub>26</sub> H <sub>16</sub> F <sub>2</sub> N <sub>4</sub> S <sub>8</sub> |
| Formula weight                                        | 650.65                                                                                      | 614.67                                                                                      | 714.89                                                                       | 676.91                                                                       |
| Crystal system                                        | <i>monoclinic</i>                                                                           | <i>monoclinic</i>                                                                           | <i>monoclinic</i>                                                            | <i>monoclinic</i>                                                            |
| Space group                                           | <i>P2<sub>1</sub>/n</i> (#14)                                                               | <i>P2<sub>1</sub>/n</i> (#14)                                                               | <i>P2<sub>1</sub>/n</i> (#14)                                                | <i>P2<sub>1</sub>/n</i> (#14)                                                |
| <i>a</i> / Å                                          | 6.7240(2)                                                                                   | 6.6638(9)                                                                                   | 6.8223(2)                                                                    | 6.8082(2)                                                                    |
| <i>b</i> / Å                                          | 20.9067(7)                                                                                  | 20.668(3)                                                                                   | 21.9312(7)                                                                   | 22.0498(7)                                                                   |
| <i>c</i> / Å                                          | 9.7855(3)                                                                                   | 9.5765(13)                                                                                  | 9.9232(3)                                                                    | 9.9559(3)                                                                    |
| $\alpha$ / deg.                                       | 90                                                                                          | 90                                                                                          | 90                                                                           | 90                                                                           |
| $\beta$ / deg.                                        | 105.654(8)                                                                                  | 104.565(7)                                                                                  | 107.541(8)                                                                   | 107.967(8)                                                                   |
| $\gamma$ / deg.                                       | 90                                                                                          | 90                                                                                          | 90                                                                           | 90                                                                           |
| <i>V</i> / Å <sup>3</sup>                             | 1324.59(9)                                                                                  | 1276.5(3)                                                                                   | 1415.68(10)                                                                  | 1421.69(10)                                                                  |
| <i>Z</i>                                              | 2                                                                                           | 2                                                                                           | 2                                                                            | 2                                                                            |
| <i>D</i> <sub>calc</sub> / g cm <sup>-3</sup>         | 1.9529                                                                                      | 2.0264                                                                                      | 1.677                                                                        | 1.67                                                                         |
| <i>R</i> <sub>int</sub>                               | 0.0572                                                                                      | 0.1011                                                                                      | 0.0658                                                                       | 0.0646                                                                       |
| <i>R</i> <sub>1</sub> ( <i>I</i> > 2.00σ( <i>I</i> )) | 0.0513                                                                                      | 0.0503                                                                                      | 0.0343                                                                       | 0.0394                                                                       |
| <i>wR</i> <sub>2</sub> (all reflections)              | 0.0677                                                                                      | 0.0742                                                                                      | 0.0554                                                                       | 0.0604                                                                       |
| GOF                                                   | 2.47                                                                                        | 1.98                                                                                        | 2.05                                                                         | 2.00                                                                         |
| CCDC                                                  | 2264325                                                                                     | 2264326                                                                                     | 2264327                                                                      | 2264331                                                                      |

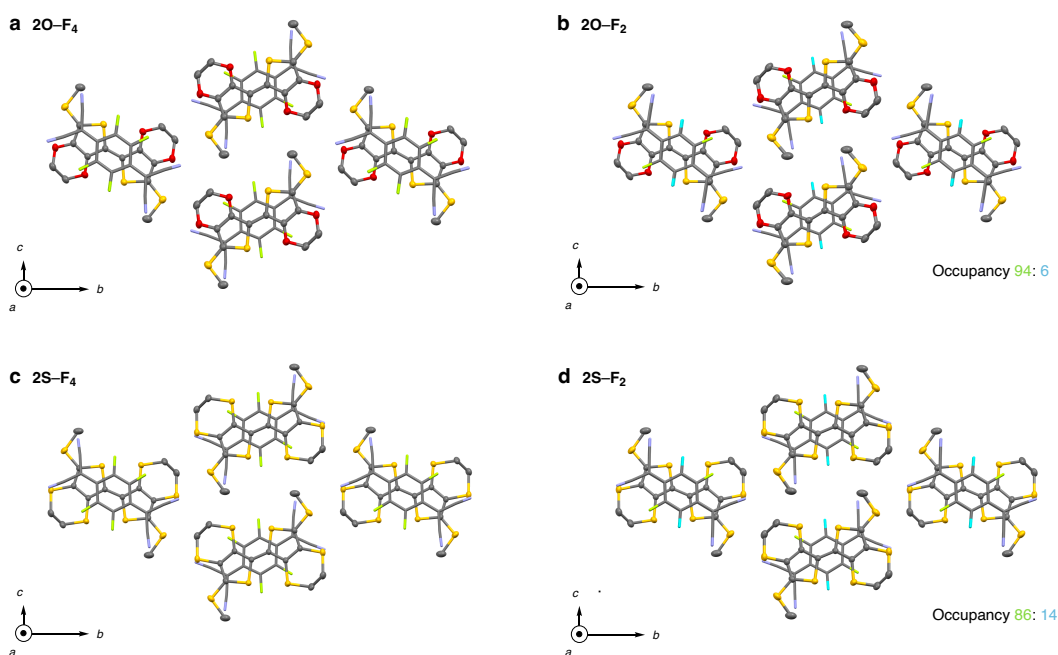

**Supplementary Fig. 9: Single-crystal structures of mixed-stack complexes at 300 K. a, 2O-F<sub>4</sub>. b, 2O-F<sub>2</sub>. c, 2S-F<sub>4</sub>. d, 2S-F<sub>2</sub>.** Locationally disordered fluorine atoms in 2O-F<sub>2</sub> and 2S-F<sub>2</sub> were colored in aqua (d). Other atoms were colored as follows; yellow: sulfur; red: oxygen; gray: carbon; blue: nitrogen; light green: fluorine. Hydrogens were omitted for clarity. ORTEP (50% thermal ellipsoid) and wire drawing for donor and acceptor, respectively.

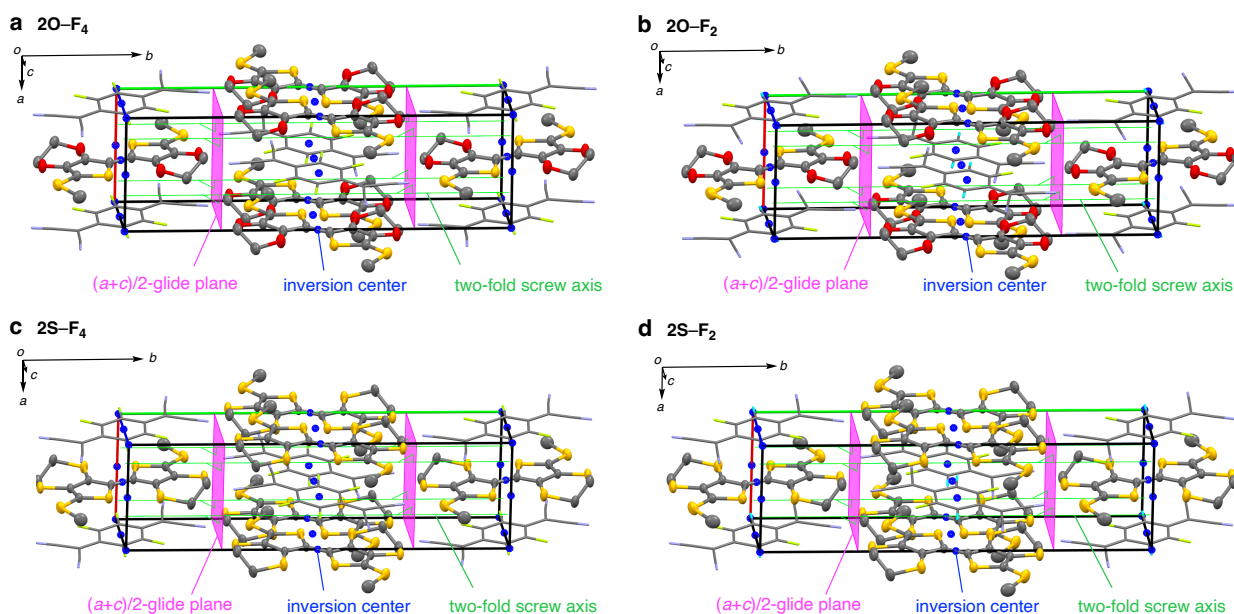

**Supplementary Fig. 10: Symmetry elements in the single-crystal structure of mixed-stack complexes at 300 K. a, 2O-F<sub>4</sub>. b, 2O-F<sub>2</sub> (major occupancy). c, 2S-F<sub>4</sub>. d, 2S-F<sub>2</sub> (major occupancy).** The structures are displayed in ORTEP (donors, 50% thermal ellipsoid) and wire drawing for donor and acceptor, respectively. Hydrogens were omitted for clarity. Atoms were colored as follows; yellow: sulfur; red:



oxygen; gray: carbon; blue: nitrogen; light green: fluorine. Disordered atoms and hydrogens were omitted for clarity.

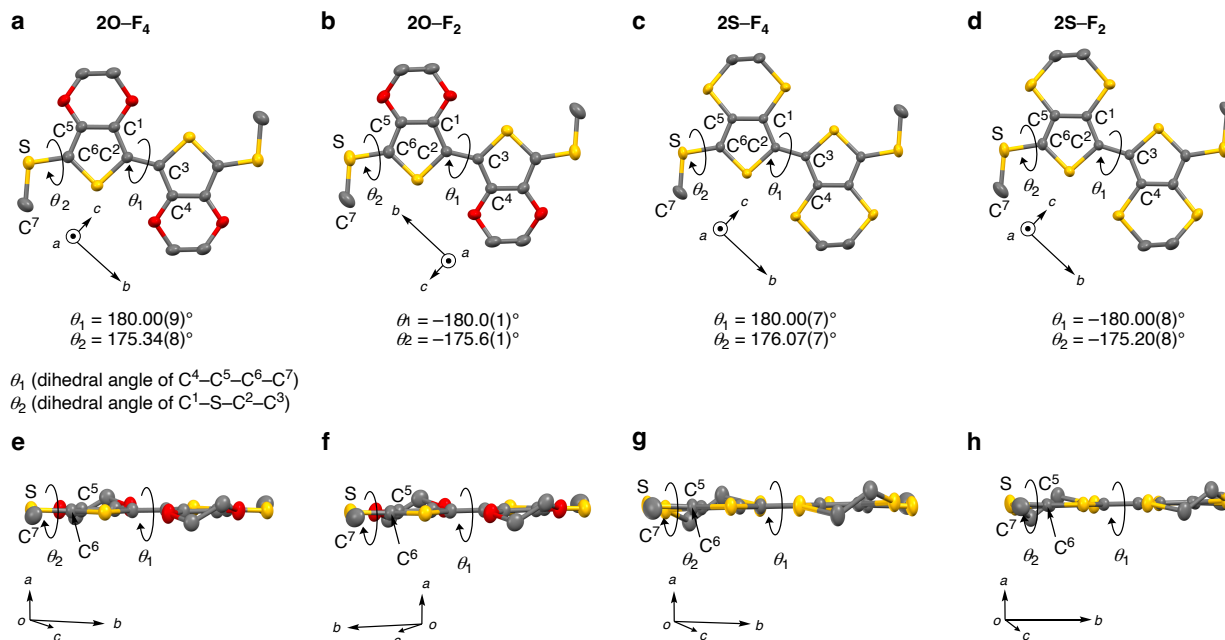

**Supplementary Fig. 11: Single-crystal structures of donors in mixed-stack complexes at 300 K.** Structures of  $2O-F_4$  (a,e),  $2O-F_2$  (b,f),  $2S-F_4$  (c,g), and  $2S-F_2$  (d,h) are shown along the  $a$ -axis (a,b,c,d) and direction perpendicular to the  $\pi$ -stacking (e,f,g,h) displayed in ORTEP (50% thermal ellipsoid) drawing. Atoms were colored as follows; yellow: sulfur; red: oxygen atom; gray: carbon atom. Hydrogens were omitted for clarity.

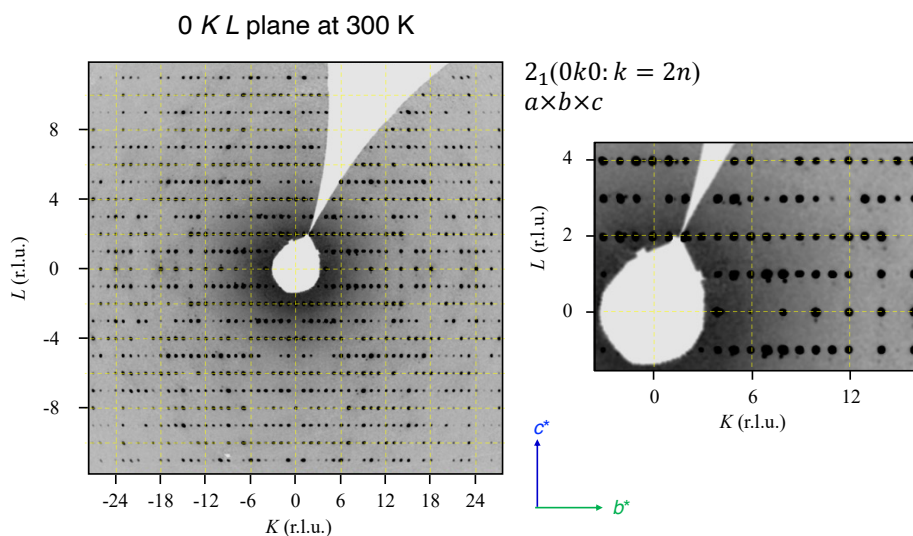

**Supplementary Fig. 12: Single-crystal X-ray diffraction precession image of the 0  $K L$  plane in the**

reciprocal lattice of 2S-F<sub>4</sub> at 300 K.

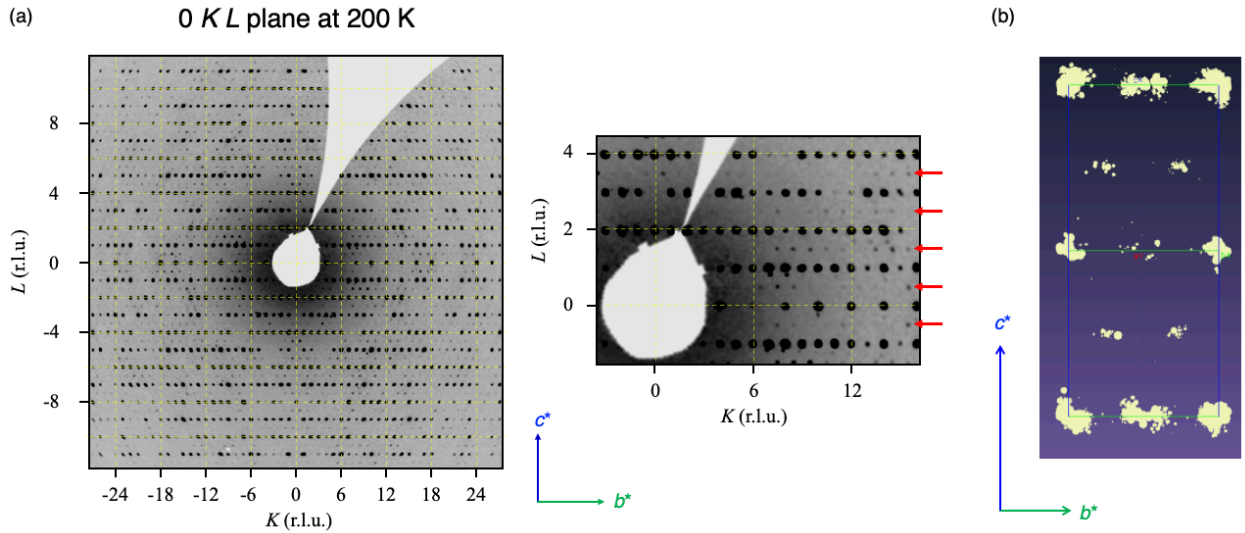

**Supplementary Fig. 13: Single-crystal X-ray diffraction precession image of the  $0\ K\ L$  plane of 2S-F<sub>4</sub> at 200 K.** (a) The reciprocal lattice. (b) The projection of the reciprocal lattice points to the  $b^*c^*$  plane ( $-1 \leq k, l \leq 1$ , b). Superlattice peaks are observed only at  $k + l = 2n$  in the in  $a \times 2b \times 2c$  lattice, which corresponds to reflection conditions of the A-base center.

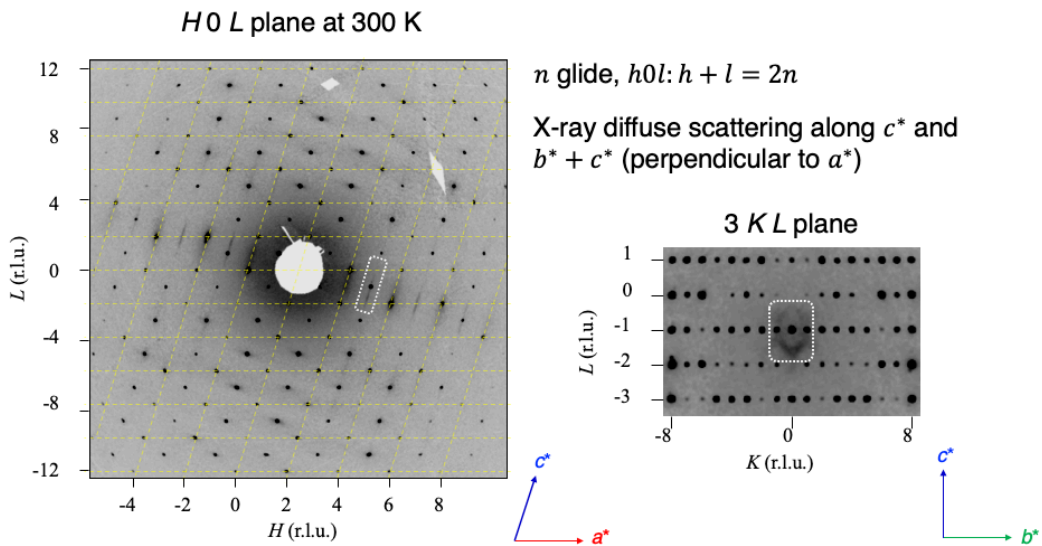

**Supplementary Fig. 14: Single-crystal X-ray diffraction precession images of the  $H\ 0\ L$  (a) and  $3\ K\ L$  (b) planes in the reciprocal lattice of 2S-F<sub>4</sub> at 300 K.** The X-ray diffuse scattering extends along the  $c^*$ -axis and  $b^*+c^*$ -direction.

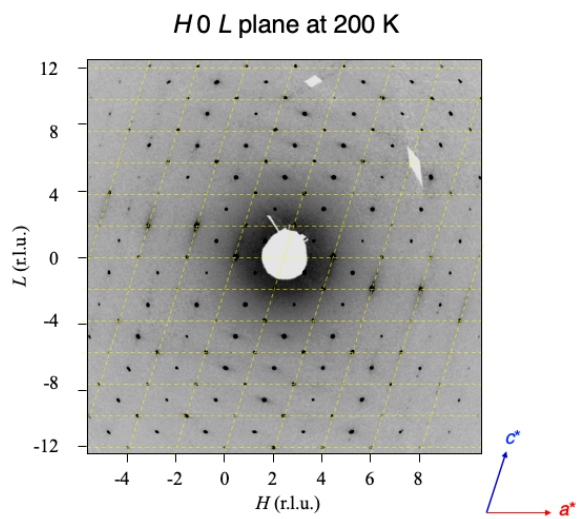

**Supplementary Fig. 15: Single-crystal X-ray diffraction precession image of the *H* 0 *L* plane in the reciprocal lattice of 2S-F<sub>4</sub> at 200 K. Significant X-ray diffuse scattering was not detected.**

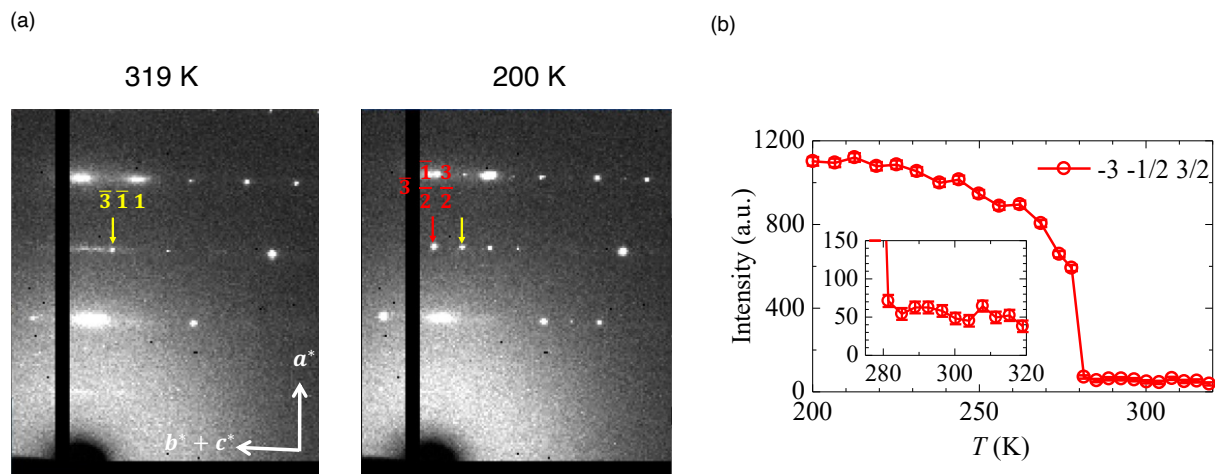

**Supplementary Fig. 16: Temperature-dependence of single-crystal X-ray diffraction precession of 2S-F<sub>4</sub>. (a) Precession images at 319 K and 200 K. (b) Temperature-dependent intensity of the signals for  $(-3, -1/2, 3/2)$ . The X-ray diffuse scattering along the  $b^*+c^*$ -direction disappeared and the superlattice peaks at  $k+l=2n$  appeared at approximately 282 K.**

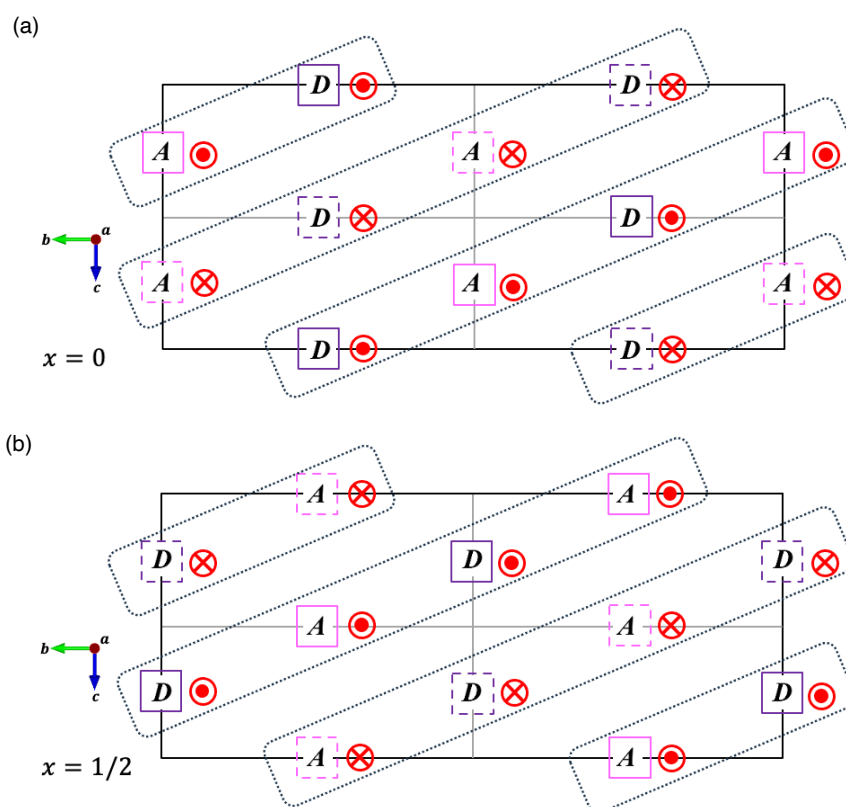

**Supplementary Fig. 17: Possible Models proposed for the molecular arrangement of 2S–F<sub>4</sub> superlattice observed at 200 K. a,  $x = 0$ . b,  $x = 1/2$ . The A/D molecules squared in the solid and dashed lines move in the opposite direction along the  $a$ -axis, leading to a stripe-pattern charge-density wave arrangement in the  $bc$  plane. The model should belong to the space group of  $P1$ .**

## 6. Theoretical calculations.

### Supplementary Note 7: Band and crystal orbital calculations

Mixed-stack complexes, particularly those at the N–I boundary, may exhibit fluctuation in  $\pi$ -dimerization at room temperatures before undergoing structural changes. This was suggested by X-ray diffuse scattering that disappeared when cooled to 200 K, as well as EMV coupling (which will be discussed later). As have been analyzed for one-dimensional charge-transfer complexes display uniformly  $\pi$ -stacked single-crystal structures with dynamic fluctuations prior to the spin-Peierls-like  $\pi$ -dimerization,<sup>22</sup> we performed theoretical calculations based on the average single-crystal XRD structures. In the calculations, the locational disordering of 2O–F<sub>2</sub> and 2S–F<sub>2</sub> (Supplementary Fig. 9b,d) may have impacts on the electronic

structures and physical properties. To get an insight into the possible impacts, we performed the calculations not only for the major but also for the minor occupancies. The calculation conditions are shown in Methods section of the text. The results showed that complexes consistently exhibited half-filled 1D electronic structures (Fig. 4c and Supplementary Fig. 18). The real parts of the HOCO and lowest-unoccupied crystal orbitals (LUCO) at the  $\Gamma$  point (0, 0, 0) were visualized by VESTA<sup>23</sup> (Fig. 4d and Supplementary Fig. 19). The transfer integrals between a donor and the six neighboring molecules (donors and acceptors) were calculated (Supplementary Fig. 27 and Supplementary Table 3) to confirm the dominant intracolumnar interactions ( $t_1$  and  $t_4$ ).

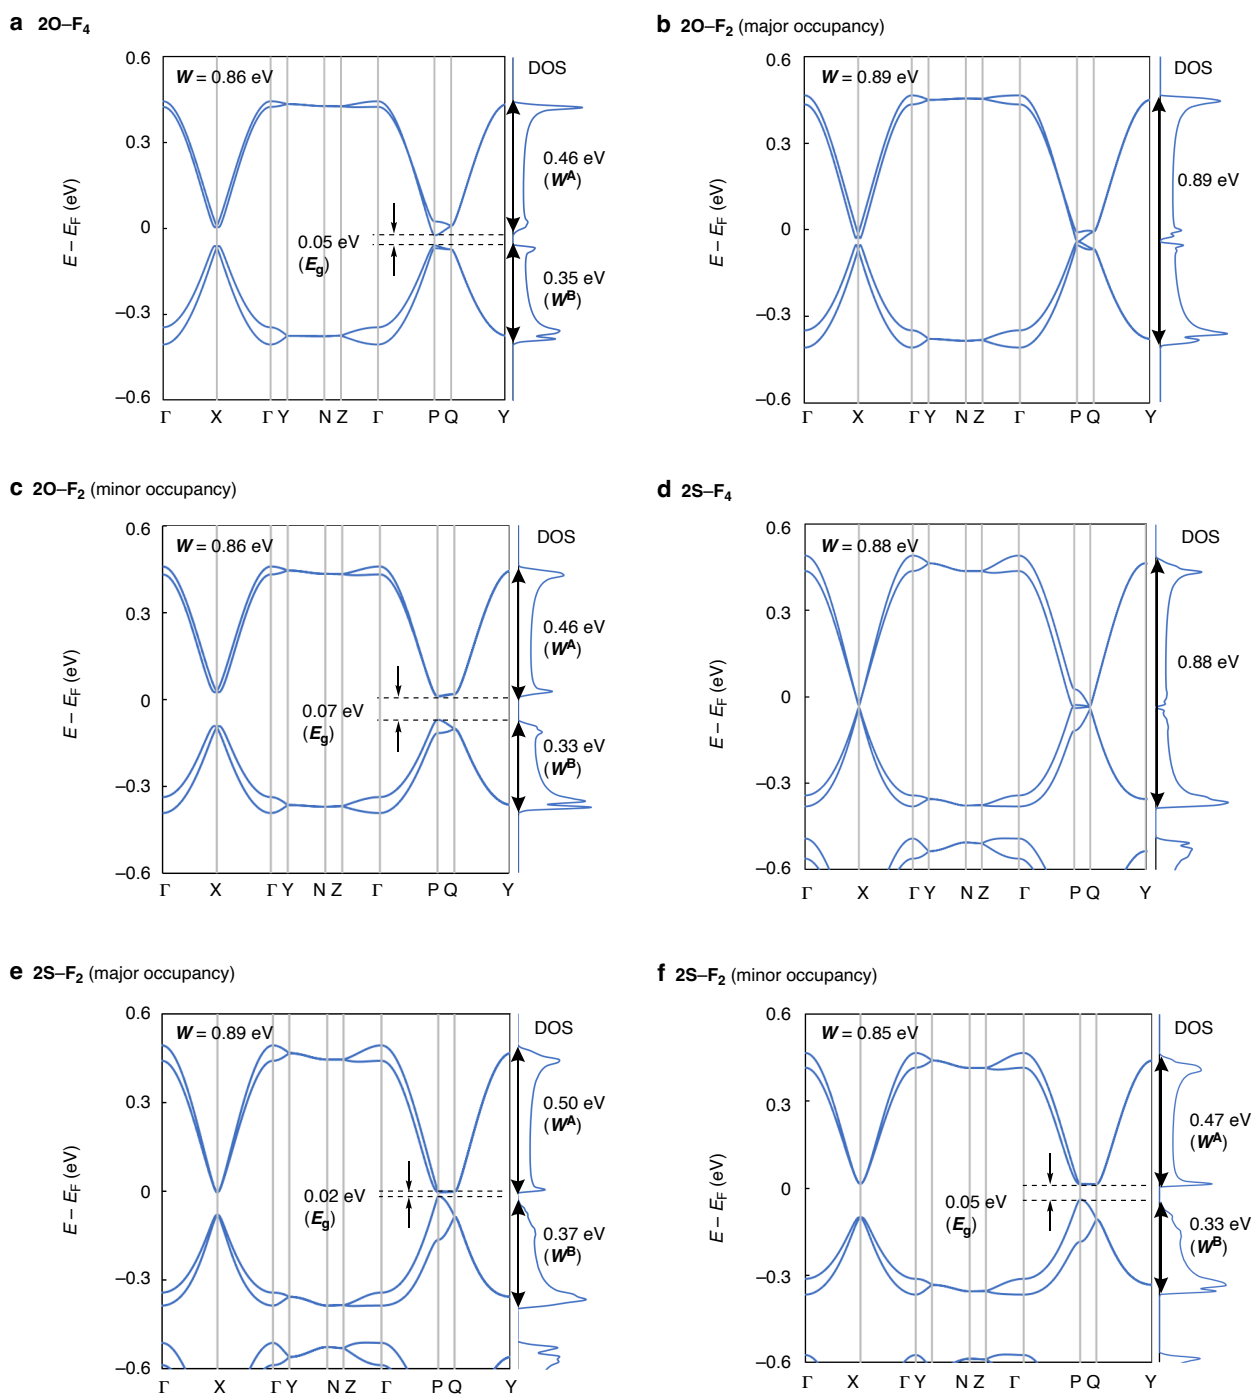

**Supplementary Fig. 18: Band structures of mixed-stack complexes.** a,  $2\text{O-F}_4$ . b,  $2\text{O-F}_2$  (major occupancy). c,  $2\text{O-F}_2$  (minor occupancy). d,  $2\text{S-F}_4$ . e,  $2\text{S-F}_2$  (major occupancy). f,  $2\text{S-F}_2$  (minor occupancy).  $\Gamma$  (0, 0, 0), X (0.5, 0, 0), Y (0, 0.5, 0), N (0, 0.5, 0.5), Z (0, 0, 0.5), P (-0.5, 0, 0.5), Q (-0.5, 0.5, 0.5). The Fermi levels ( $E_F$ ) are determined by occupying electrons according to the Fermi distribution function.

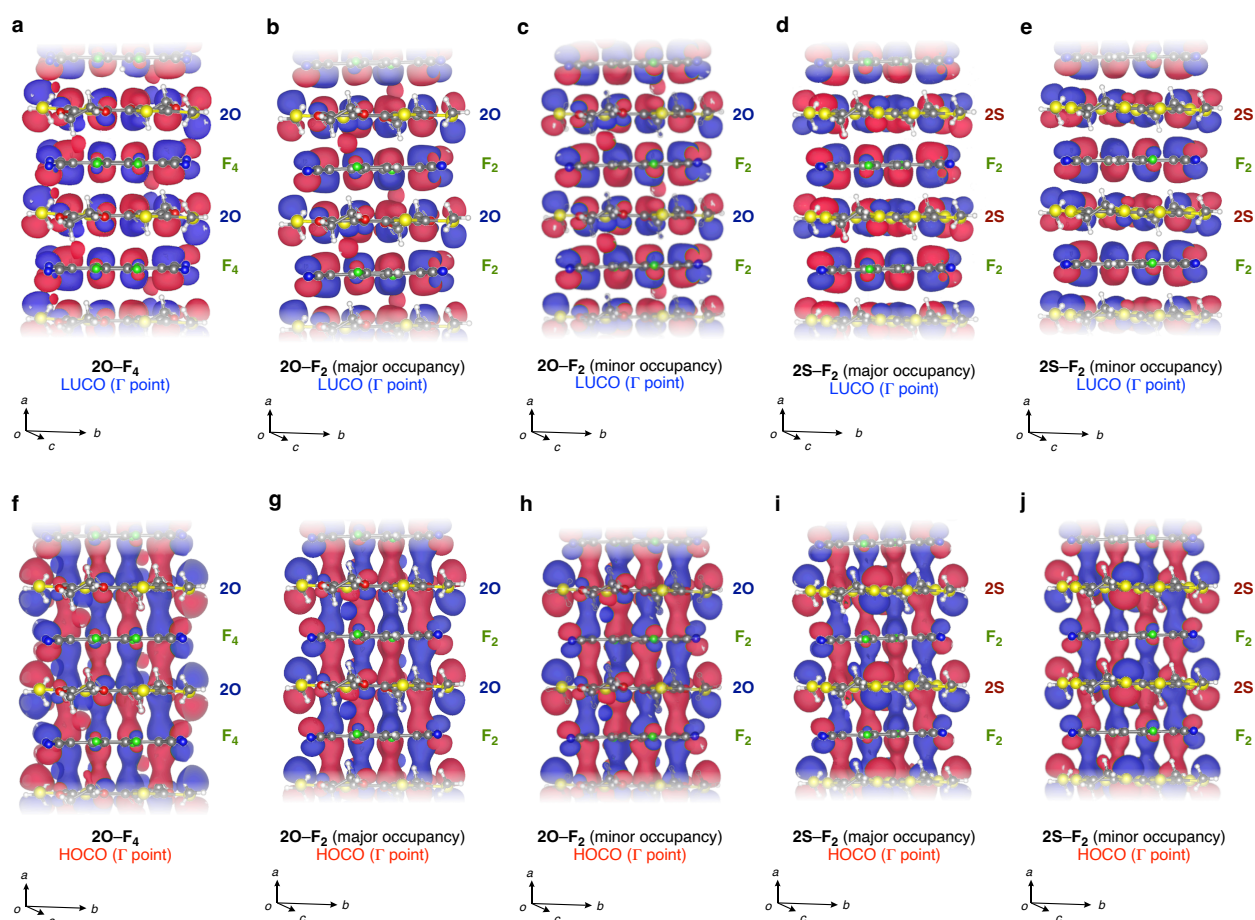

**Supplementary Fig. 19: Crystal orbitals of mixed-stack complexes.** **a,b,c,d,e**, The LUCO shapes of  $2O-F_4$  (**a**),  $2O-F_2$  (**b**, major occupancy),  $2O-F_2$  (**c**, minor occupancy),  $2S-F_2$  (**d**, major occupancy), and  $2S-F_2$  (**e**, minor occupancy). **f,g,h,i,j**, The HOCO shapes of  $2O-F_4$  (**f**),  $2O-F_2$  (**g**, major occupancy),  $2O-F_2$  (**h**, minor occupancy),  $2S-F_2$  (**i**, major occupancy), and  $2S-F_2$  (**j**, minor occupancy). Crystal orbitals were visualized by VESTA.<sup>25</sup> The orbitals with positive and negative phases were colored with magenta and navy, respectively. Atoms were colored as follows; yellow: sulfur; red: oxygen; gray: carbon; blue: nitrogen; light green: fluorine.

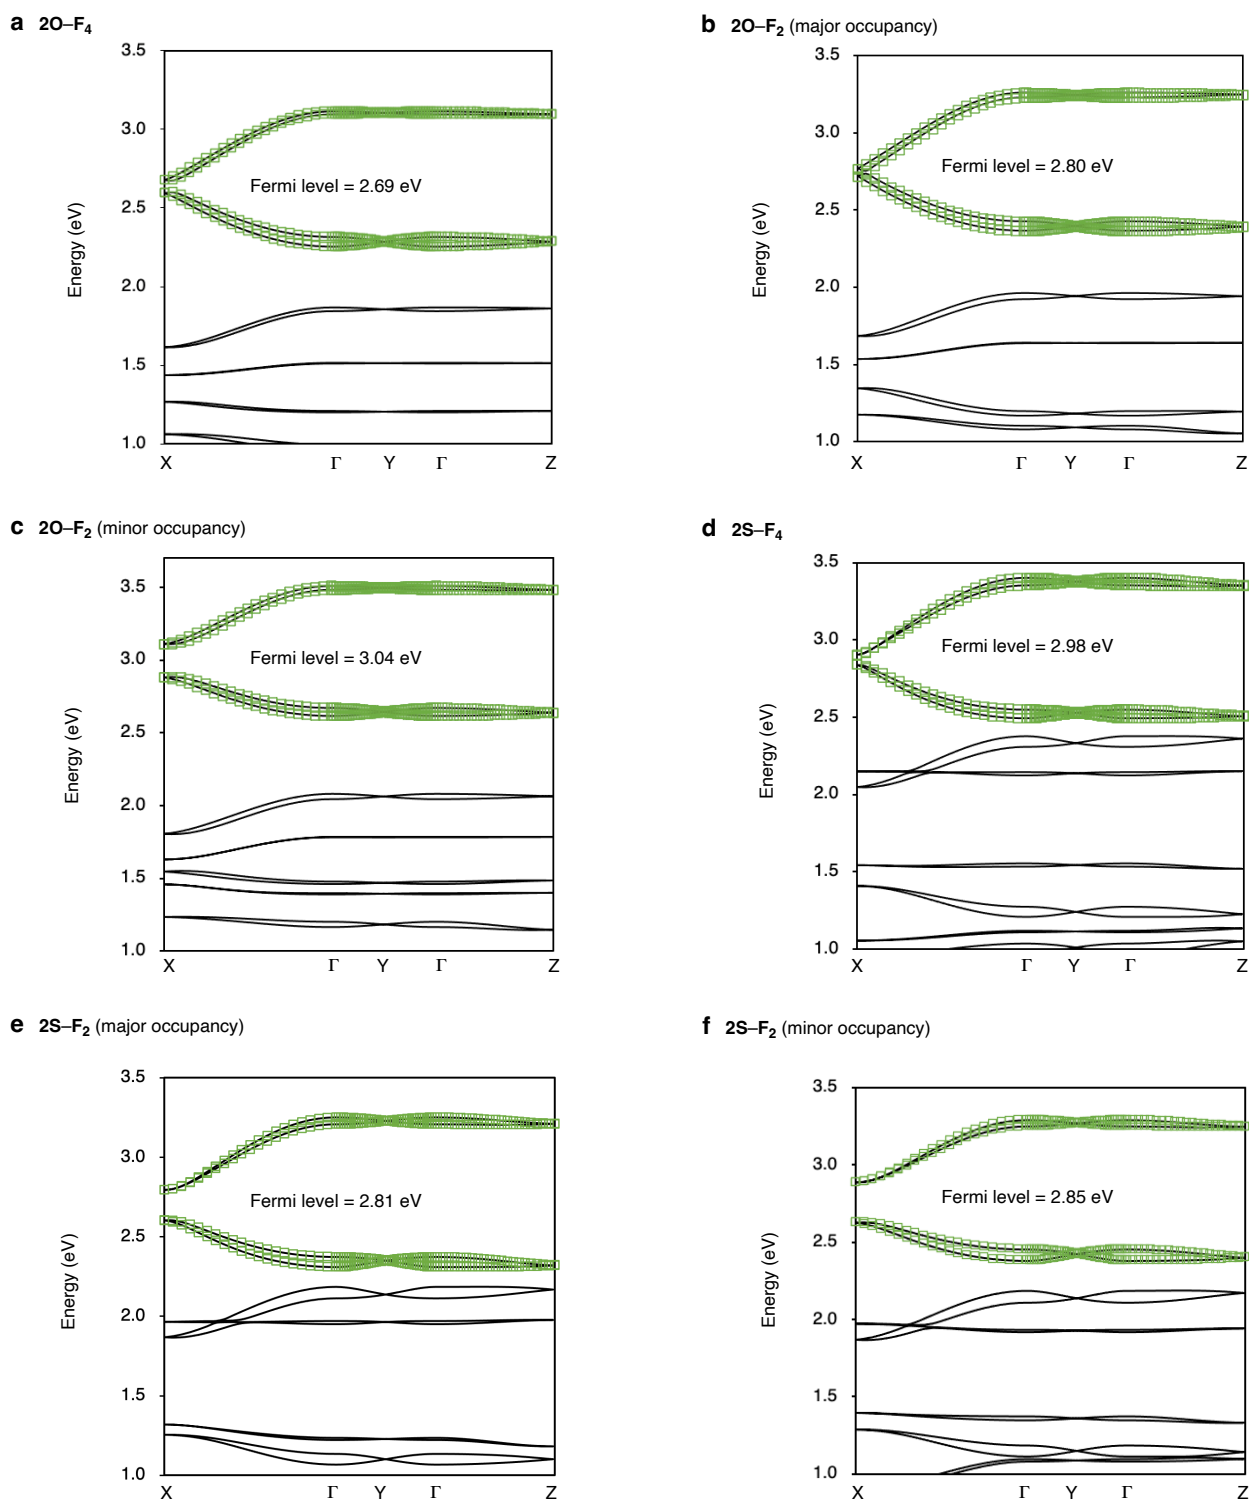

**Supplementary Fig. 20: Wannier interpolation bands (shown in green squares) and band dispersion (shown in black solid lines). a,  $2O-F_4$ . b,  $2O-F_2$  (major occupancy). c,  $2O-F_2$  (minor occupancy). d,  $2S-F_4$ . e,  $2S-F_2$  (major occupancy). f,  $2S-F_2$  (minor occupancy).**



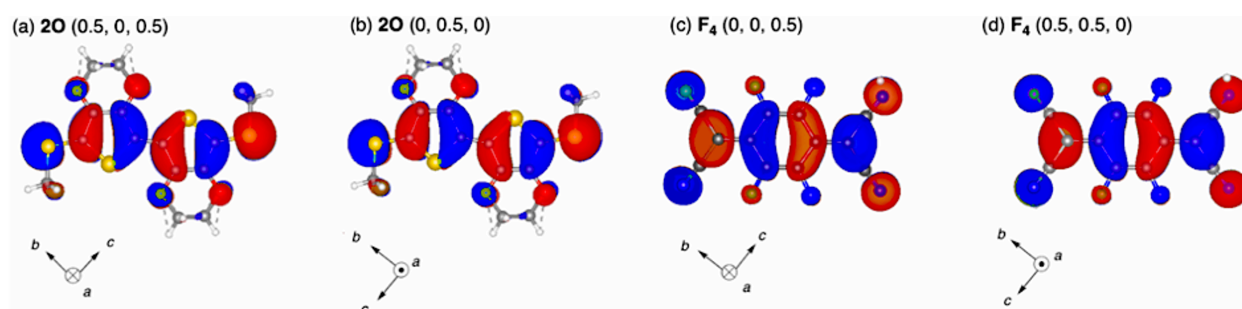

**Supplementary Fig. 21: The maximally localized Wannier function of 2O–F<sub>4</sub> in a cell.** Atoms surrounding the molecules were omitted for clarity. Atoms were colored as follows; yellow: sulfur; red: oxygen; gray: carbon; blue: nitrogen; light green: fluorine. **a**, 2O (0.5, 0, 0.5). **b**, 2O (0, 0.5, 0). **c**, F<sub>4</sub> (0, 0, 0.5). **d**, F<sub>4</sub> (0.5, 0.5, 0).

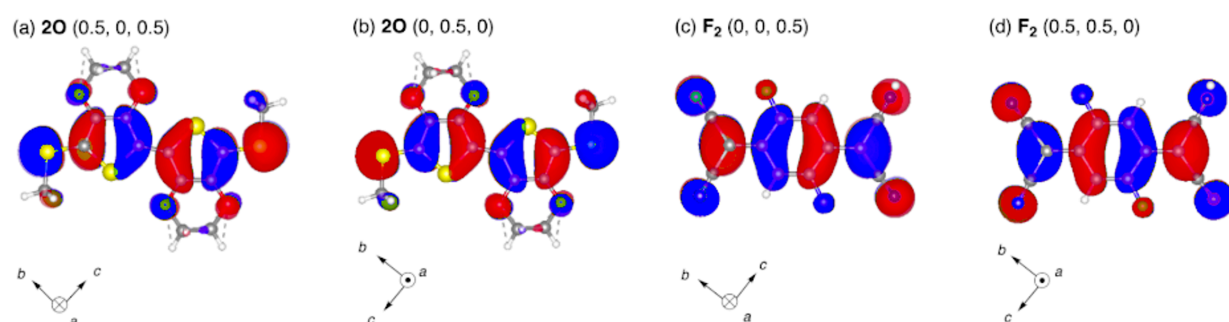

**Supplementary Fig. 22: The maximally localized Wannier function of 2O–F<sub>2</sub> (major occupancy) in a cell.** Atoms surrounding the molecules were omitted for clarity. Atoms were colored as follows; yellow: sulfur; red: oxygen; gray: carbon; blue: nitrogen; light green: fluorine. **a**, 2O (0.5, 0, 0.5). **b**, 2O (0, 0.5, 0). **c**, F<sub>2</sub> (0, 0, 0.5). **d**, F<sub>2</sub> (0.5, 0.5, 0).

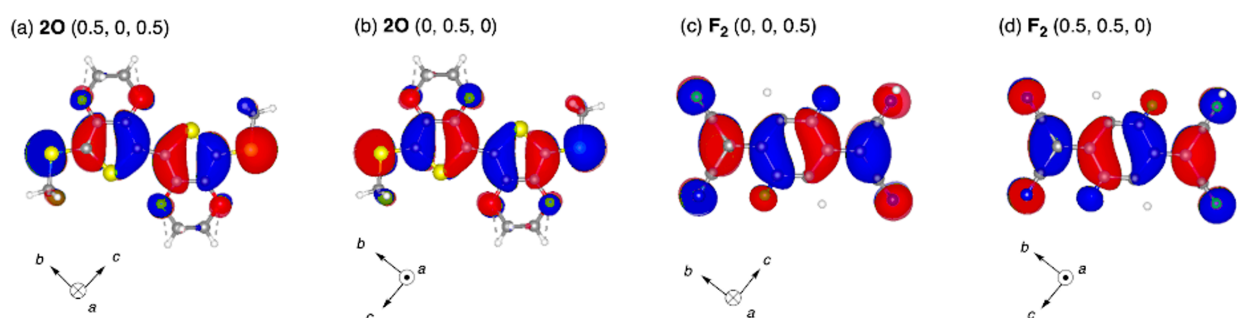

**Supplementary Fig. 23: The maximally localized Wannier function of 2O–F<sub>2</sub> (minor occupancy) in a cell.** Atoms surrounding the molecules were omitted for clarity. Atoms were colored as follows; yellow: sulfur; red: oxygen; gray: carbon; blue: nitrogen; light green: fluorine. **a**, 2O (0.5, 0, 0.5). **b**, 2O (0, 0.5, 0). **c**, F<sub>2</sub> (0, 0, 0.5). **d**, F<sub>2</sub> (0.5, 0.5, 0).

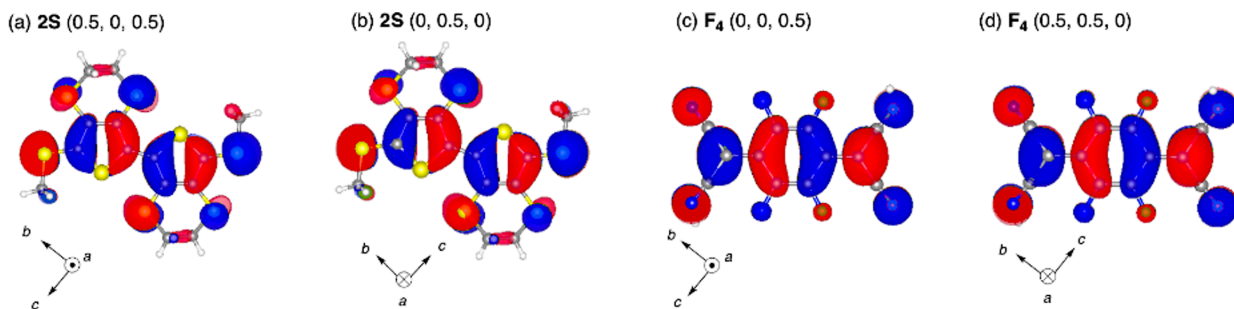

**Supplementary Fig. 24: The maximally localized Wannier function of 2S–F<sub>4</sub> in a cell.** Atoms surrounding the molecules were omitted for clarity. Atoms were colored as follows; yellow: sulfur; red: oxygen; gray: carbon; blue: nitrogen; light green: fluorine. **a**, 2S (0.5, 0, 0.5). **b**, 2S (0, 0.5, 0). **c**, F<sub>4</sub> (0, 0, 0.5). **d**, F<sub>4</sub> (0.5, 0.5, 0).

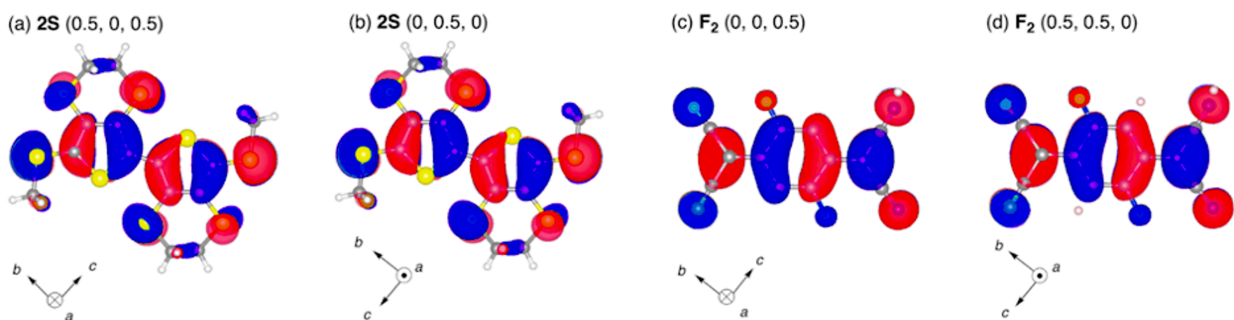

**Supplementary Fig. 25: The maximally localized Wannier function of 2S–F<sub>2</sub> (major occupancy) in a cell.** Atoms surrounding the molecules were omitted for clarity. Atoms were colored as follows; yellow: sulfur; red: oxygen; gray: carbon; blue: nitrogen; light green: fluorine. **a**, 2S (0.5, 0, 0.5). **b**, 2S (0, 0.5, 0). **c**, F<sub>2</sub> (0, 0, 0.5). **d**, F<sub>2</sub> (0.5, 0.5, 0).

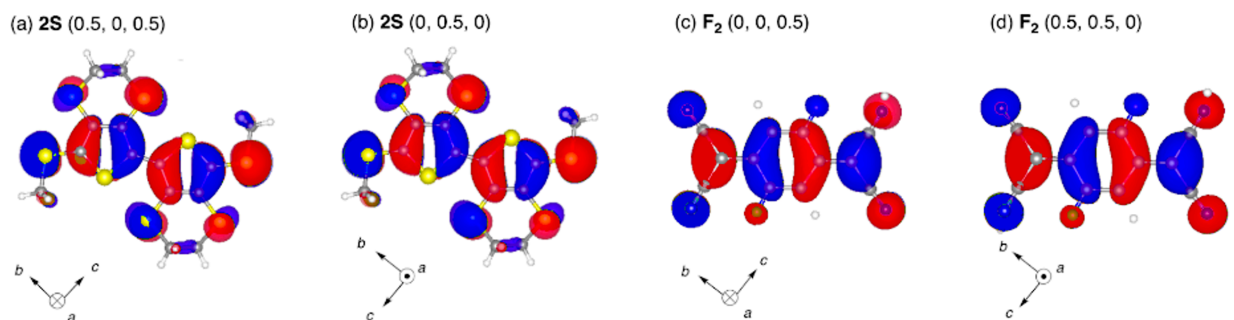

**Supplementary Fig. 26: The maximally localized Wannier function of 2S–F<sub>2</sub> (minor occupancy) in a cell.** Atoms surrounding the molecules were omitted for clarity. Atoms were colored as follows; yellow: sulfur; red: oxygen; gray: carbon; blue: nitrogen; light green: fluorine. **a**, 2S (0.5, 0, 0.5). **b**, 2S (0, 0.5, 0). **c**, F<sub>2</sub> (0, 0, 0.5). **d**, F<sub>2</sub> (0.5, 0.5, 0).

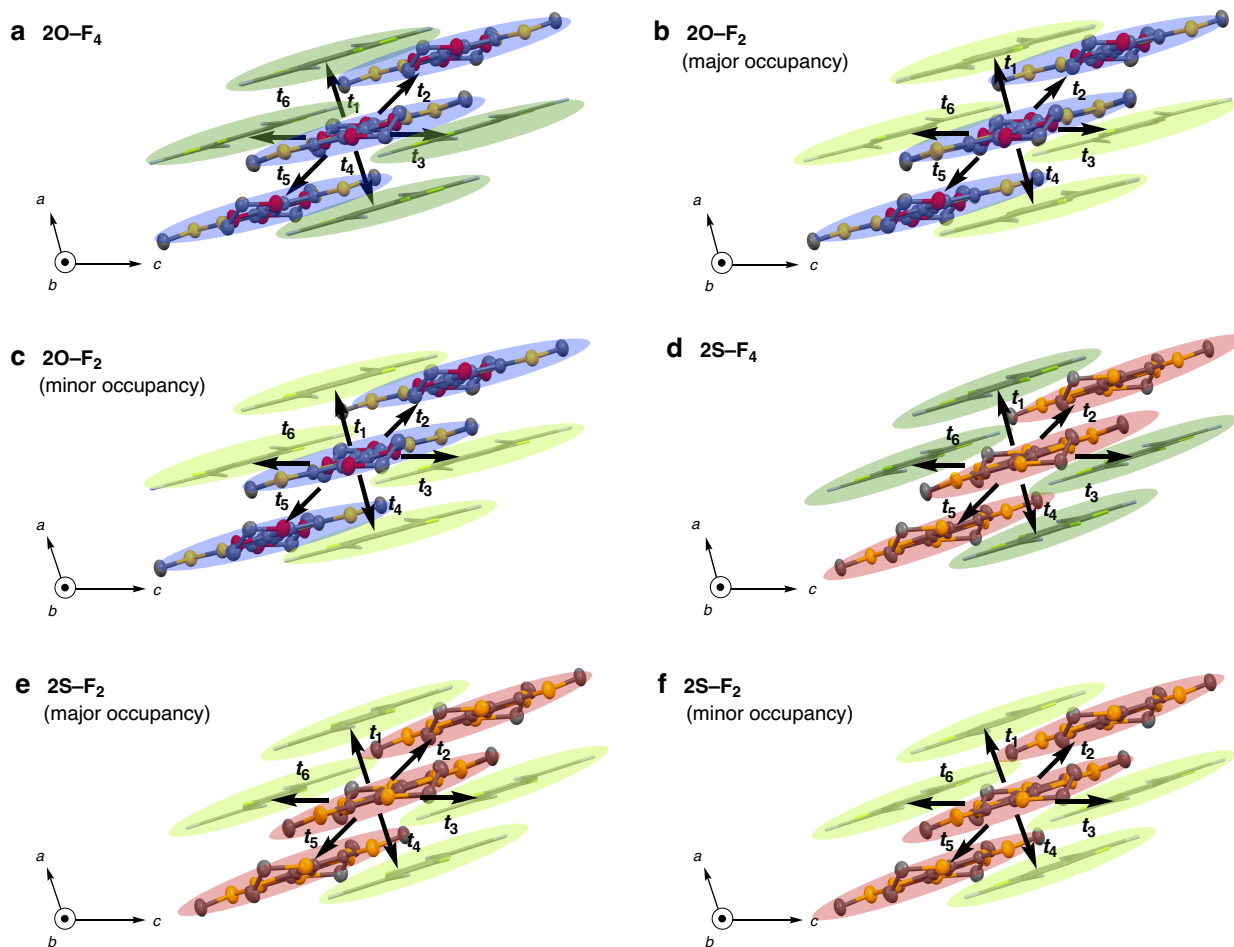

**Supplementary Fig. 27: Labels for  $t$  values for mixed-stack complexes.** a, 2O-F<sub>4</sub>. b, 2O-F<sub>2</sub> (major occupancy). c, 2O-F<sub>2</sub> (minor occupancy). d, 2S-F<sub>4</sub>. e, 2S-F<sub>2</sub> (major occupancy). f, 2S-F<sub>2</sub> (minor occupancy). The values were summarized in Supplementary Table 3. 2O, 2S, F<sub>4</sub>, and F<sub>2</sub> were colored with a blue, red, green, and light green background, respectively for clarity. Atoms were colored as follows; yellow: sulfur; red: oxygen; gray: carbon; blue: nitrogen; light green: fluorine.

**Supplementary Table 3: Transfer integrals for mixed-stack complexes.** The intracolumnar values ( $t_1$  and  $t_4$ ) are shown as  $t_{DA}$  in Table 1.

| Complex    | 2O-F <sub>4</sub> | 2O-F <sub>2</sub> | 2O-F <sub>2</sub> | 2S-F <sub>4</sub> | 2S-F <sub>2</sub> | 2S-F <sub>2</sub> |
|------------|-------------------|-------------------|-------------------|-------------------|-------------------|-------------------|
|            |                   | (major occupancy) | (minor occupancy) |                   | (major occupancy) | (minor occupancy) |
| $t_1$ (eV) | 0.203             | 0.209             | 0.197             | 0.208             | 0.206             | 0.187             |
| $t_2$ (eV) | 0.00497           | -0.00429          | -0.00395          | 0.0183            | 0.0187            | 0.0182            |
| $t_3$ (eV) | 0.00190           | -0.00229          | -0.00200          | -0.000301         | 0.0005174         | 0.000759          |
| $t_4$ (eV) | 0.203             | 0.209             | 0.197             | 0.208             | 0.206             | 0.187             |
| $t_5$ (eV) | 0.00495           | -0.00422          | -0.00400          | 0.0183            | 0.0187            | 0.0182            |
| $t_6$ (eV) | -0.0121           | 0.0141            | 0.0134            | 0.000953          | 0.00252           | 0.00190           |

**a** 2O (1) in 2O-F<sub>4</sub>

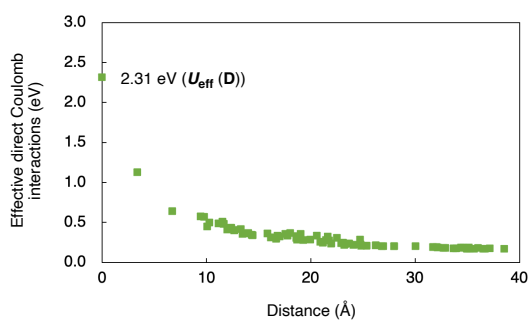

**b** 2O (2) in 2O-F<sub>4</sub>

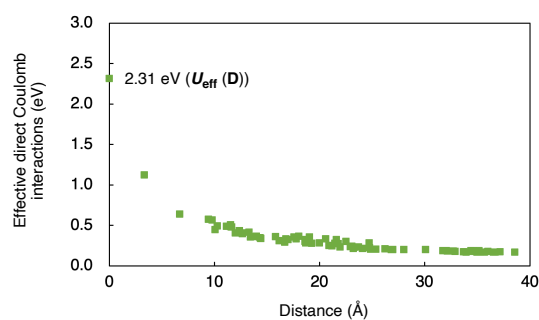

**c** F<sub>4</sub> (1) in 2O-F<sub>4</sub>

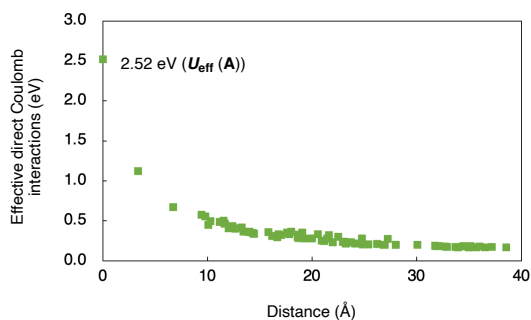

**d** F<sub>4</sub> (2) in 2O-F<sub>4</sub>

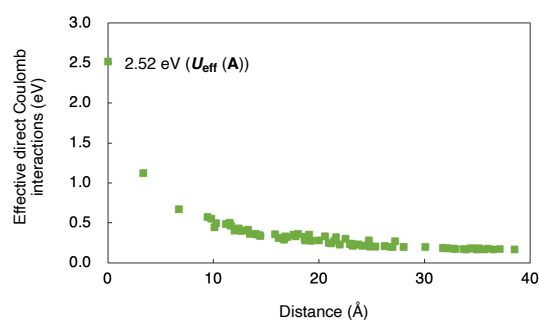

**Supplementary Fig. 28: Effective direct Coulomb interactions in a cell of 2O-F<sub>4</sub>.** Values of donors (a,b), and acceptors (c,d).

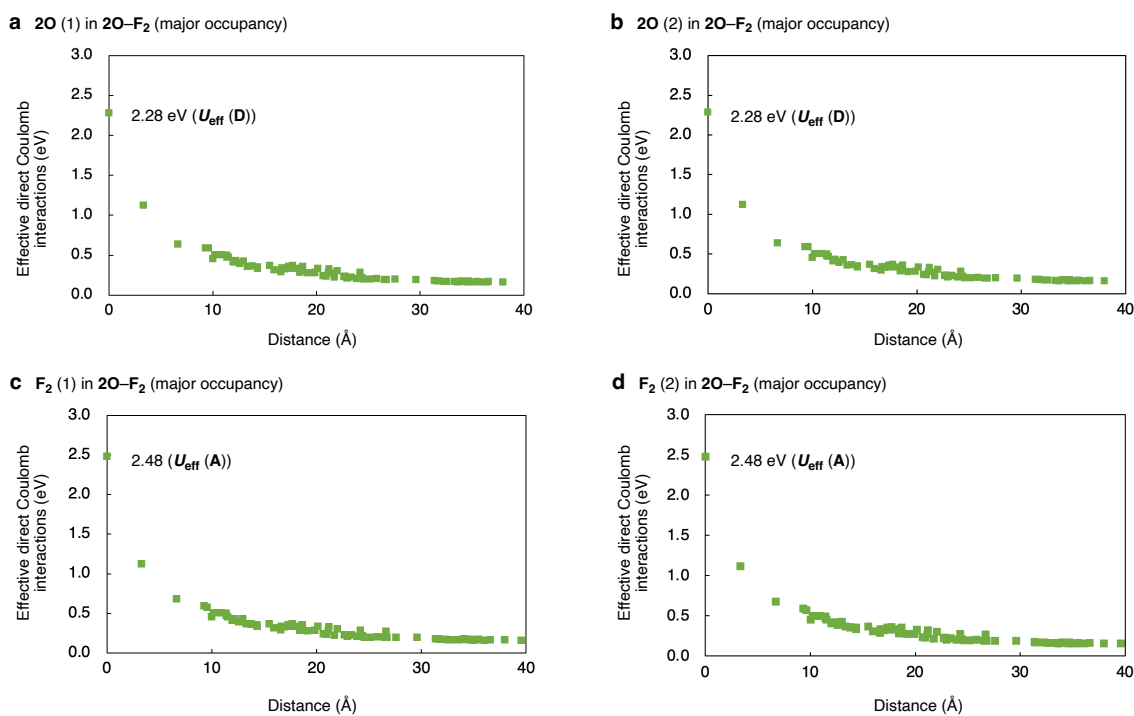

**Supplementary Fig. 29: Effective direct Coulomb interactions in a cell of 2O-F<sub>2</sub> in the major occupancy. Values of donors (a,b), and acceptors (c,d).**

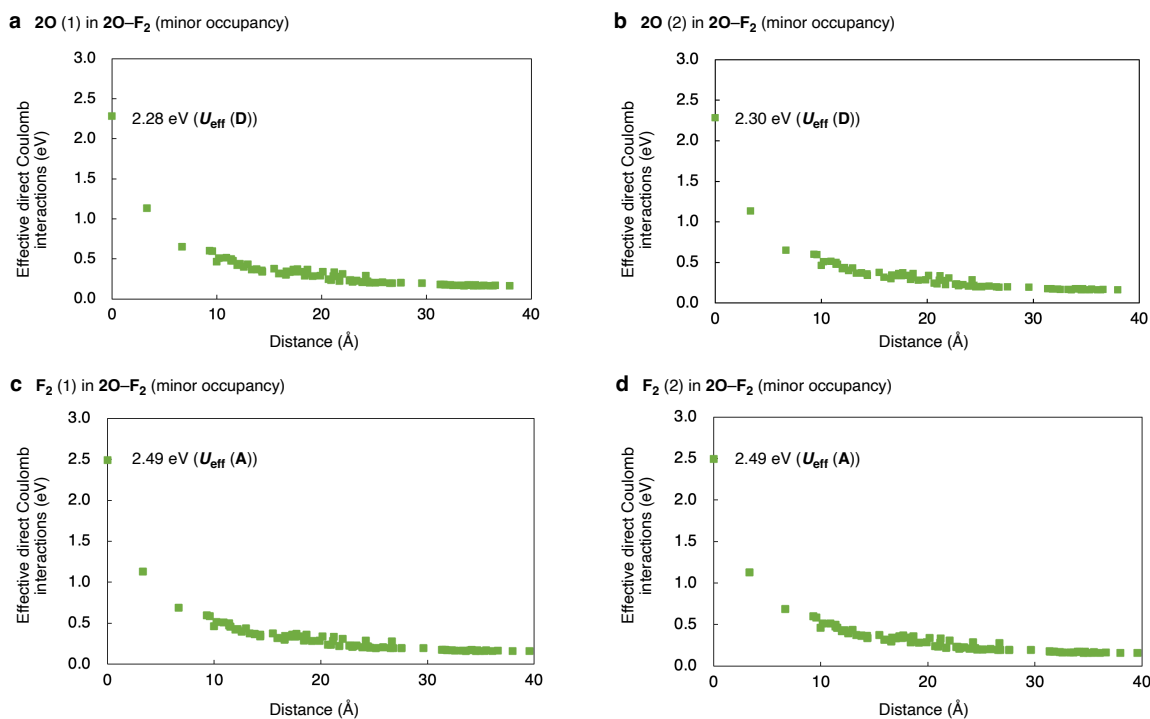

**Supplementary Fig. 30: Effective direct Coulomb interactions in a cell of 2O-F<sub>2</sub> in the minor occupancy. Values of donors (a,b), and acceptors (c,d).**

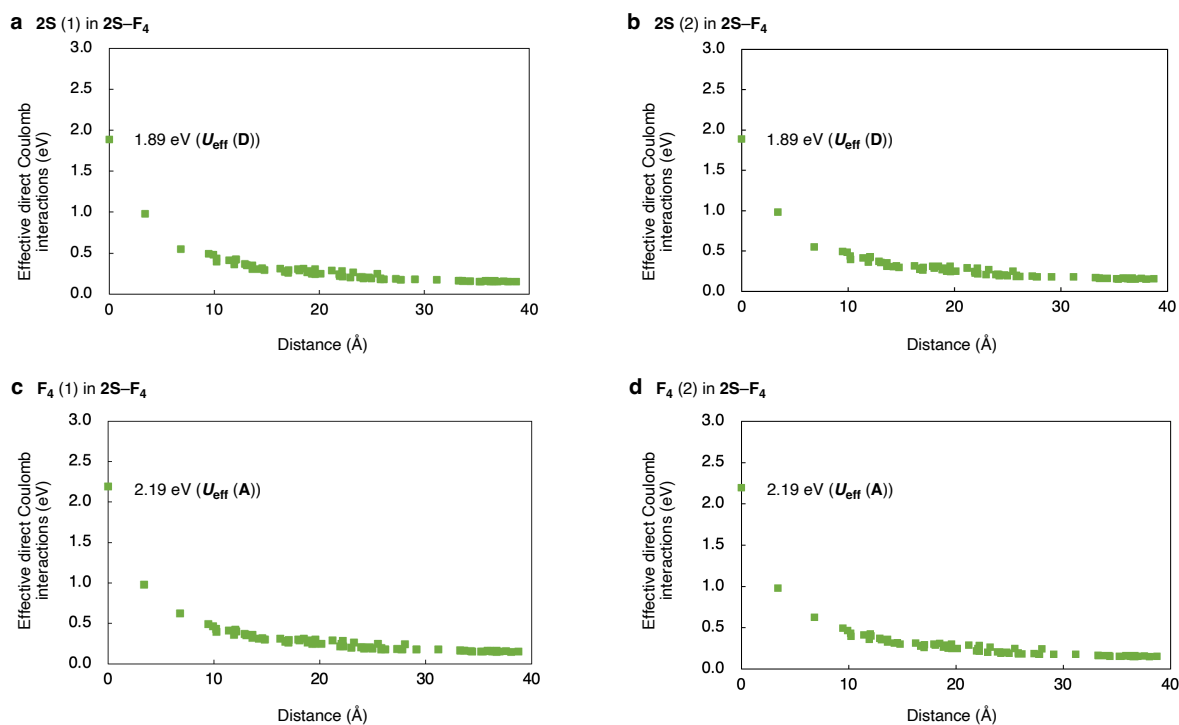

**Supplementary Fig. 31: Effective direct Coulomb interactions in a cell of 2S-F<sub>4</sub>. Values of donors (a,b), and acceptors (c,d).**

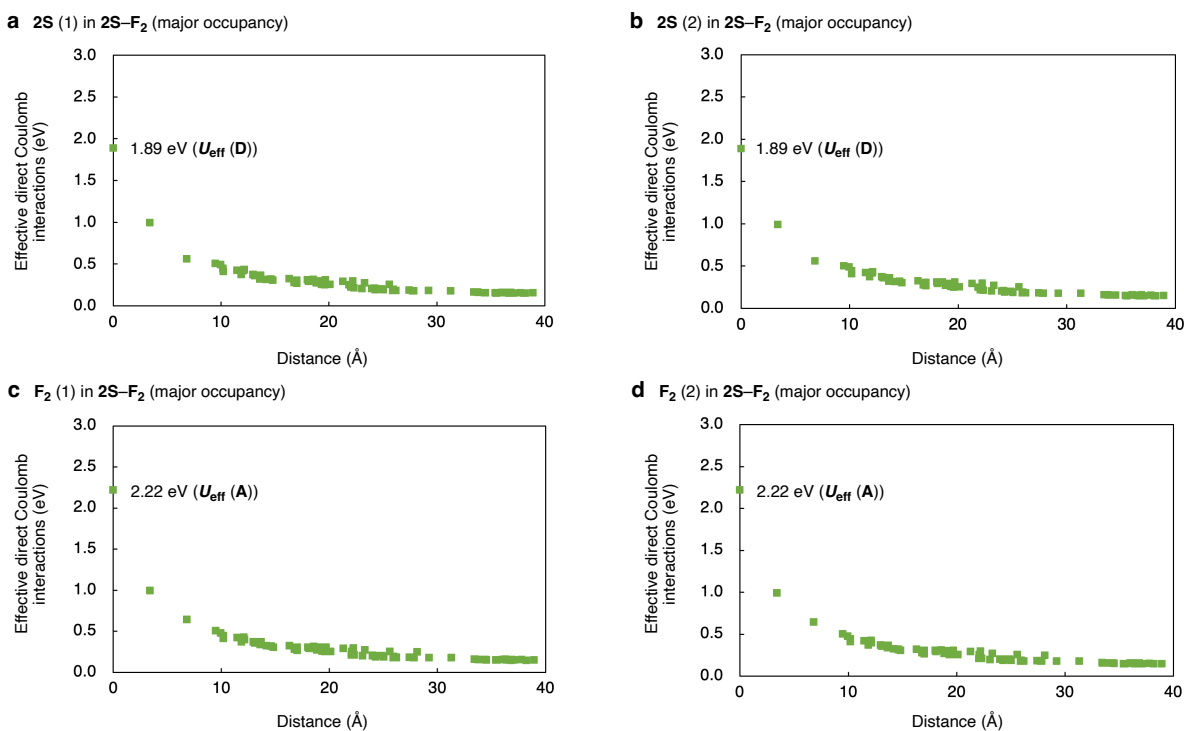

**Supplementary Fig. 32: Effective direct Coulomb interactions in a cell of 2S-F<sub>2</sub> in the major occupancy. Values of donors (a,b), and acceptors (c,d).**

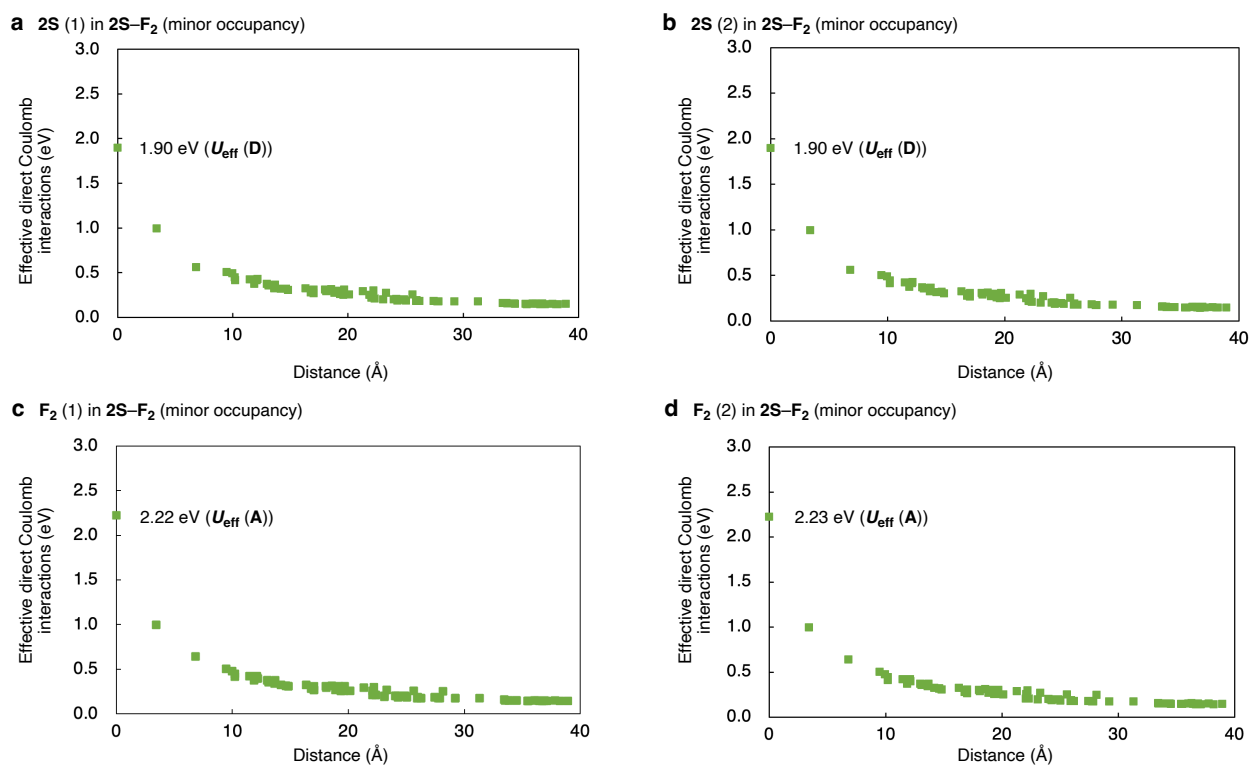

**Supplementary Fig. 33: Effective direct Coulomb interactions in a cell of 2S-F<sub>2</sub> in the minor occupancy. Values of donors (a,b), and acceptors (c,d).**

## 7. Optical properties

### Supplementary Note 8: Optical reflection spectroscopy measurements.

The mixed-stack complexes showed multiple sharp peaks in the optical reflectivity spectra along the  $\pi$ -stacking direction in the low-energy region of 0.14–0.19 eV at 293 K (Fig. 6 and Supplementary Fig. 34), except for the nearly neutral 2S-F<sub>2</sub>. The optical conductivity spectrum of 2S-F<sub>4</sub> along the  $\pi$ -stacking direction, which was derived from the polarized infrared reflectivity spectrum, and Raman spectrum at the excitation wavelength of 532 nm at 293 K are shown in Supplementary Fig. 35b,d. The optical conductivity and Raman spectra likely exhibited the same modes. Considering the inversion center of the single-crystal structure of 2S-F<sub>4</sub> categorized to be  $P2_1/n$  with uniform  $\pi$ -stacked donors and acceptors along the  $C2$  glide symmetry, the Raman-active modes should not be visible in IR, while the IR-active modes should not be visible in Raman. The coincidence of the shapes of the observed IR and Raman spectra indicates the dynamic fluctuating of donor-acceptor- $\pi$ -stacking dimerization.<sup>24,25</sup> The optical activation of the  $a_g$  mode

along the  $\pi$ -stacking direction can be ascribed to the electron-molecular vibration (EMV) couplings.<sup>26,27</sup>

To confirm that the EMV coupling effect is responsible for these signals, we performed numerical simulations of the optical activation of  $a_g$  modes based on the donor-acceptor dimer model proposed by Painelli, A. and Girlando, A.<sup>28</sup> The calculation requires the frequencies ( $\omega$ ) of the molecular normal modes ( $Q$ ) and the corresponding  $g$ -values defined as  $g = \sqrt{2\omega}d\epsilon/dQ$ . Initially, we performed DFT calculations for the isolated states of the donor and acceptor molecules to ascertain the initial parameters for the simulation. The eigenfrequencies of molecular vibrations were determined through standard DFT vibrational analysis. The  $g$ -value, which are the derivatives of the radical electronic level  $\epsilon_{\text{HOMO}}$  (or  $\epsilon_{\text{LUMO}}$  for neutral acceptor) in terms of  $Q$ , are estimated by slightly deforming the molecular structure along  $Q$  and calculating the energy shifts of the HOMO or LUMO levels. The quantum chemical calculation package Gaussian16<sup>29</sup> was used for the DFT calculations. The B3LYP function was used for the density functional, with the basis sets 6-311G(d)<sup>30,31,32</sup> for the donor molecule and 6-311G+(d) for the acceptor molecule. Noting that B3LYP tends to overestimate eigenfrequencies  $\omega$ , the calculated frequencies were corrected by applying the standard scaling factor of 0.96. The values of  $\omega$  and  $g$  vary based on the valence state of the molecule. In the present study, we calculated these values for both the neutral and monovalent ionic states of the donor and acceptor and interpolated for the relevant ionicity states ( $+\delta$  for the donor and  $-\delta$  for the acceptor;  $\delta$ : degree of charge transfer; Supplementary Table 4), according to the method outlined in the paper by Painelli, A. and Girlando, A.<sup>28</sup> Using these values as initial parameters, calculations of the dimer model were conducted. The specific parameters used for the calculation are detailed in Supplementary Table 5. By adjusting the calculated values of  $\omega$  and  $g$  for each vibrational mode, as listed in Supplementary Table 4, we achieved good agreement with experimental values, as shown in Supplementary Fig. 35b,c. The adjustment of parameters falls within a reasonable range, affirming that the dimer model accurately reproduced the experimental spectrum.

The optical activation of the  $a_g$  mode due to EMV coupling implies that the one-dimensional molecular



stacking is not uniform, contradicting the uniform columnar structure predicted by X-ray structural analysis (Supplementary Table 2 and Supplementary Fig. 10). The activation of the EMV modes hints at dynamic deviations from the average structure within the molecular columns, supporting the dynamic  $\pi$ -dimerization fluctuation. In the unit cell of this crystal, there are two sets of the donor–acceptor pairs, which are linked via inversion symmetry. The transition moments generated by the EMV coupling within a pair couple in either the same direction or in the opposite direction with another pair, resulting in both infrared active and Raman active EMV modes. This explains the coincidence of the shapes of the observed IR and Raman spectra. The slight difference in peak position between the IR and Raman signals can be understood as a Davydov splitting due to the dipole interaction between the pairs.

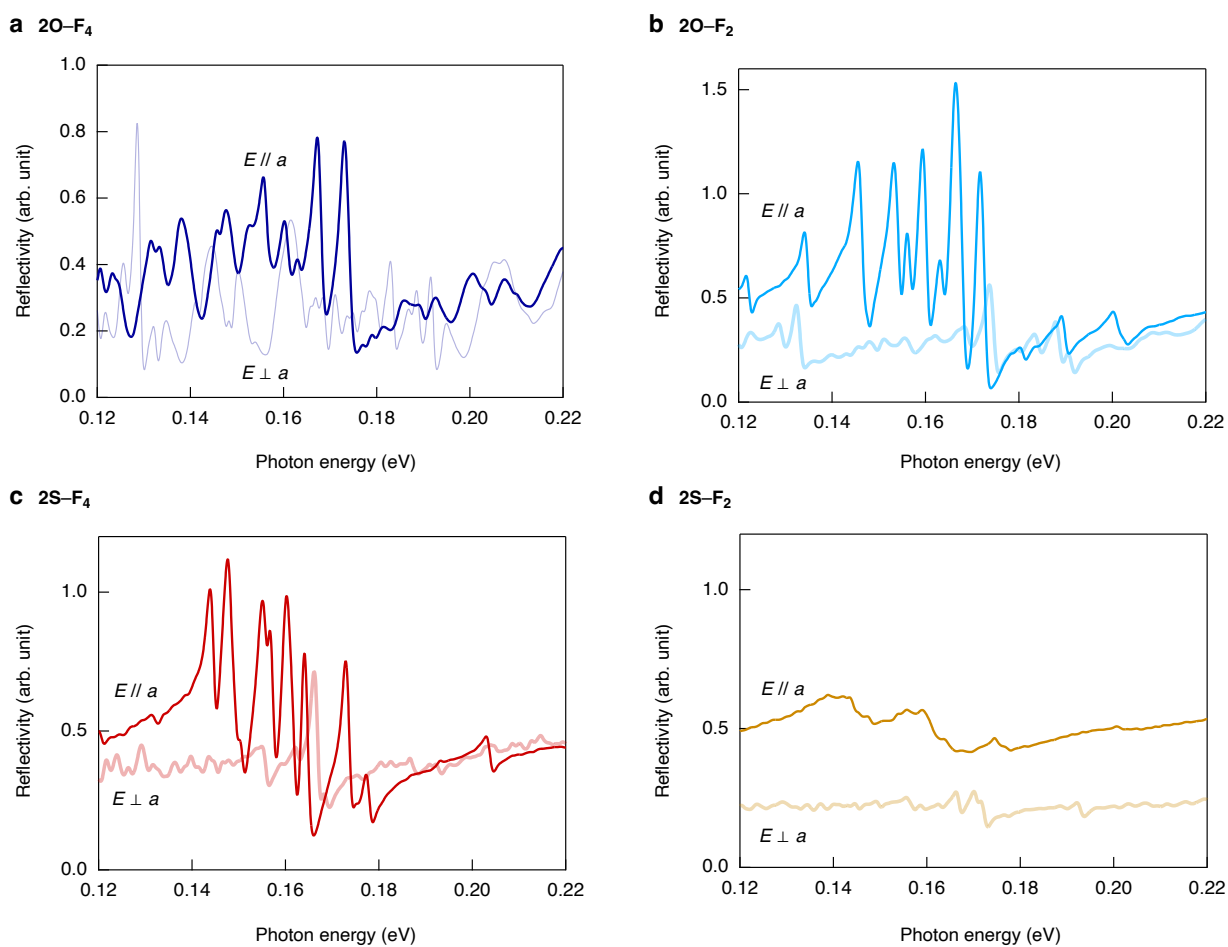

**Supplementary Fig. 34: Reflectivity spectra of mixed-stack complexes.** Spectra of **2O-F<sub>4</sub>** (a), **2O-F<sub>2</sub>** (b), **2S-F<sub>4</sub>** (c), and **2S-F<sub>2</sub>** (d) at 293 K, measured with the electric field of the light ( $E$ ) parallel ( $//$ ) and

perpendicular ( $\perp$ ) to the  $\pi$ -stacking directions. The relatively thin single-crystal **2O**-F<sub>4</sub> exhibited the stripe-pattern signals for the low-energy region due to the interference effect from the backside.

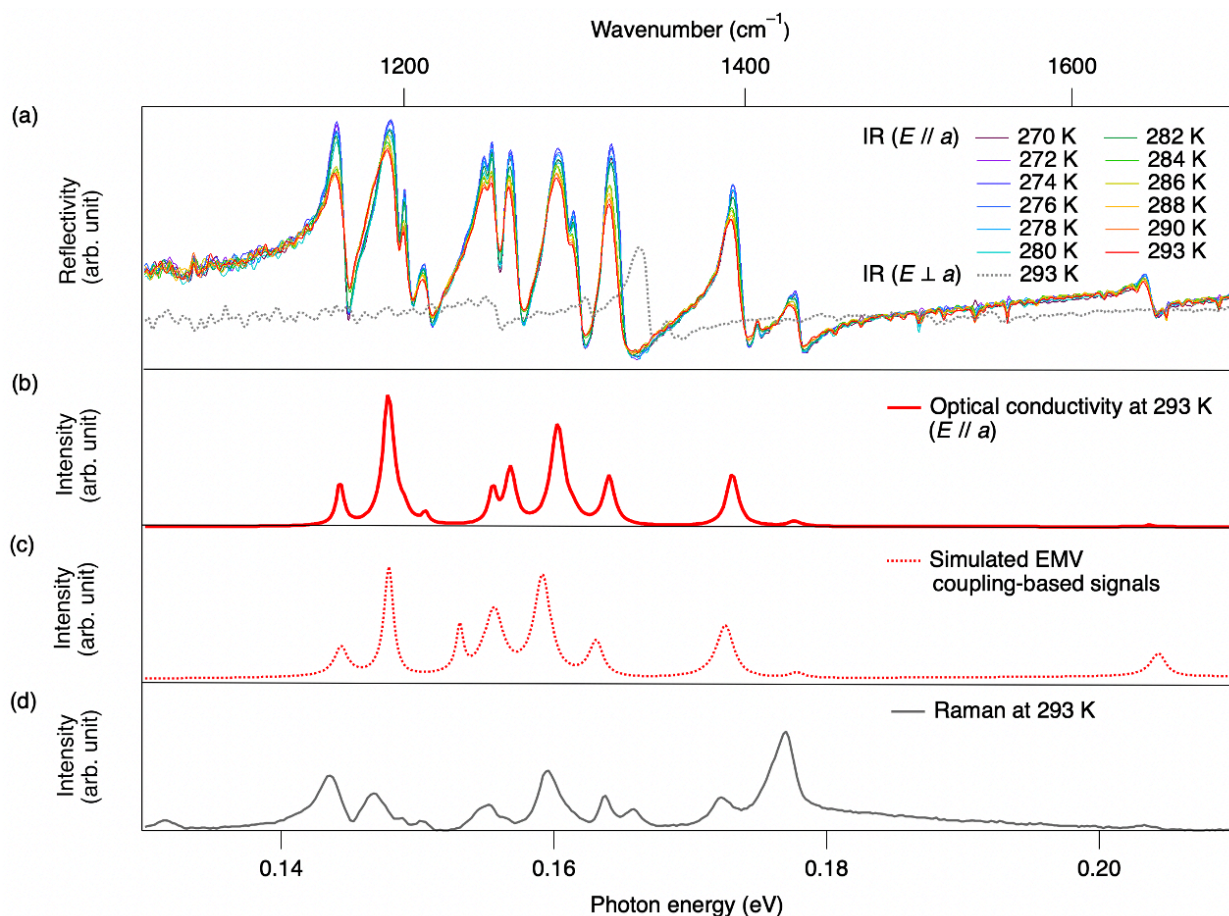

**Supplementary Fig. 35: Temperature-dependent polarized reflectivity spectra.** **a**, The spectra were obtained by applying an electric field along the  $\pi$ -stacking direction (solid lines) and perpendicular to the  $\pi$ -stacking direction (a dashed line). **b**, Optical conductivity spectrum derived from the polarized infrared spectrum at 293 K along the  $\pi$ -stacking direction through the Kramers-Kronig transformation. **c**, Simulated EMV coupling-based spectrum. The values of  $\omega$  and  $g$  for both the neutral and monovalent ionic states of the donor and acceptor were calculated and interpolated for the relevant ionicity according to the method outlined in the paper by Painelli, A. and Girlando, A.,<sup>28</sup> as listed in Supplementary Table 4. Using these values as initial parameters, calculations of the dimer model were conducted. The specific parameters in the calculations are listed in Supplementary Table 5. **d**, Raman spectrum at 293 K (Excitation wavelength: 532 nm).

**Supplementary Table 4: The fundamental molecular vibration modes of donor and acceptor molecules estimated in the relevant ionicity calculated from their neutral and ionic states.**

| Entry | Molecule             | Wavenumber (cm <sup>-1</sup> ) | g value (meV) |
|-------|----------------------|--------------------------------|---------------|
| 1     | <b>F<sub>4</sub></b> | 1608.28                        | 43.85         |
| 2     | <b>2S</b>            | 1435.71                        | 5.84          |
| 3     | <b>F<sub>4</sub></b> | 1405.09                        | 126.67        |
| 4     | <b>2S</b>            | 1380.18                        | 12.46         |
| 5     | <b>2S</b>            | 1335.17                        | 21.54         |
| 6     | <b>2S</b>            | 1312.94                        | 27.06         |
| 7     | <b>2S</b>            | 1295.49                        | 18.23         |
| 8     | <b>F<sub>4</sub></b> | 1235.33                        | 47.93         |
| 9     | <b>2S</b>            | 1156.45                        | 25.70         |
| 10    | <b>2S</b>            | 1116.31                        | 6.30          |

**Supplementary Table 5: Parameters used in the calculation of the vibronic spectrum of 2S–F<sub>4</sub>.**

| Entry | Molecule             | Wavenumber (cm <sup>-1</sup> ) | g value (meV) | linewidth (cm <sup>-1</sup> ) |
|-------|----------------------|--------------------------------|---------------|-------------------------------|
| 1     | <b>F<sub>4</sub></b> | 1650                           | 20            | 10                            |
| 2     | <b>2S</b>            | 1435                           | 10            | 10                            |
| 3     | <b>F<sub>4</sub></b> | 1395                           | 30            | 10                            |
| 4     | <b>2S</b>            | 1320                           | 30            | 10                            |
| 5     | <b>2S</b>            | 1295                           | 50            | 10                            |
| 6     | <b>2S</b>            | 1260                           | 40            | 10                            |
| 7     | <b>2S</b>            | 1250                           | 10            | 10                            |
| 8     | <b>F<sub>4</sub></b> | 1245                           | 40            | 10                            |
| 9     | <b>2S</b>            | 1215                           | 60            | 10                            |
| 10    | <b>2S</b>            | 1170                           | 30            | 10                            |

## 8. Electrical conductivities

### Supplementary Note 9: Electrical resistivity measurements.

The current–voltage ( $I$ – $V$ ) characteristics by a two-probe method at room temperature from  $-10$  to  $10$  V for **2O–F<sub>4</sub>/2S–F<sub>2</sub>**,  $-3$  to  $3$  V for **2S–F<sub>2</sub>**, and  $-1.2$  to  $1.5$  V for **2S–F<sub>4</sub>** (Supplementary Fig. 36) confirmed the ohmic behaviors for the  $V$  ranges. Within the ohmic regions, the temperature ( $T$ )-dependent resistance ( $R$ ) of the sample was measured by a four-probe method upon cooling the electrode from  $340$  to  $200$  K and subsequent heating to  $340$  K by  $1.0$ – $1.5$  K  $\text{min}^{-1}$  (Figs. 7 and 8a).

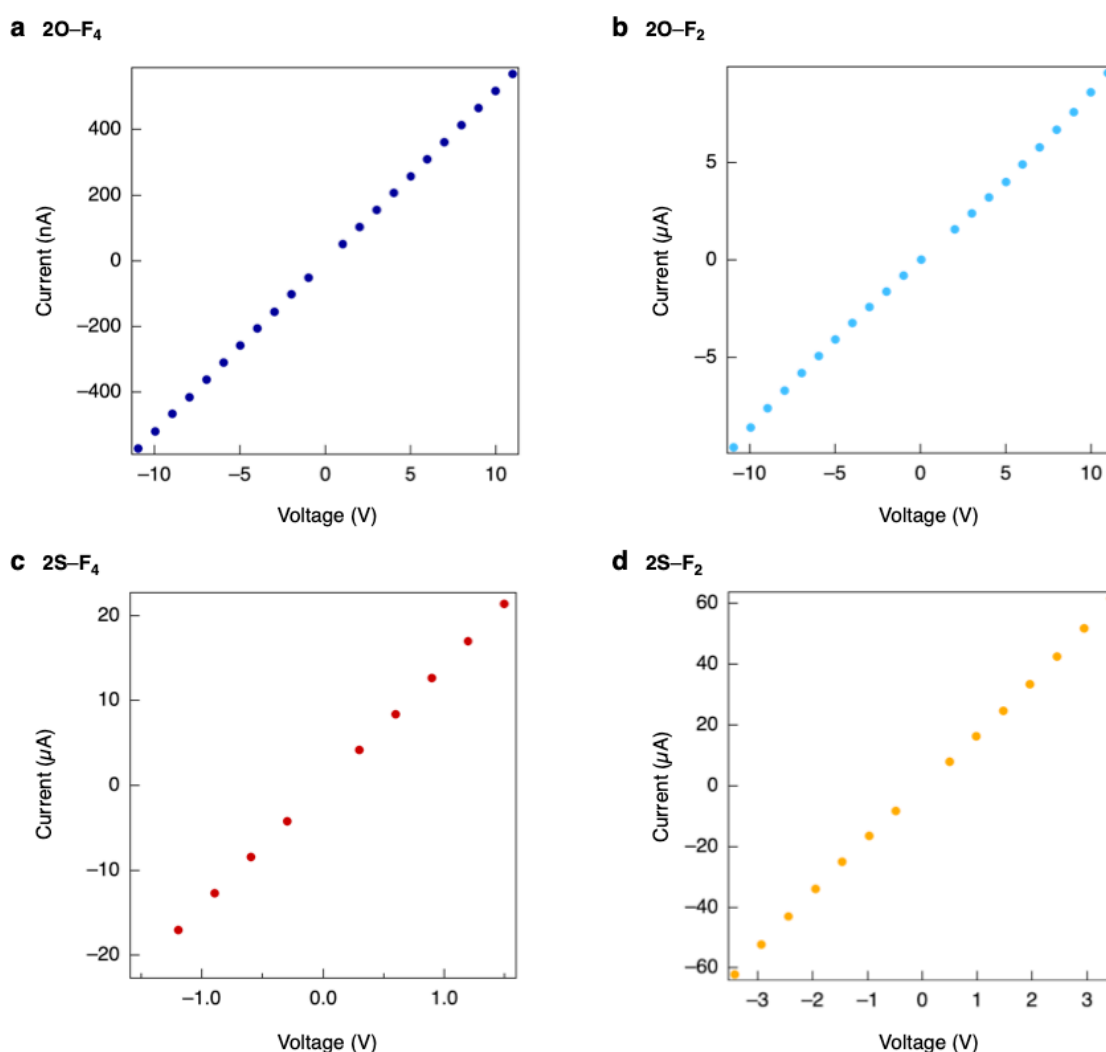

**Supplementary Fig. 36:  $I$ – $V$  curve of mixed-stack complexes. a, 2O–F<sub>4</sub>. b, 2O–F<sub>2</sub>. c, 2S–F<sub>4</sub>. d, 2S–F<sub>2</sub>. The measurements were performed at 293 K.**

## 9. Magnetic properties

### Supplementary Note 10: ESR measurements.

The X-band (~9.4 GHz) continuous wave electron spin resonance (ESR) experiments were performed on single-crystal **2O-F<sub>4</sub>**, **2O-F<sub>2</sub>**, **2S-F<sub>4</sub>**, and **2S-F<sub>2</sub>** (Fig. 8d,e, and Supplementary Figs. 37–39). From the ESR spectra, the spin susceptibility values  $\chi_{\text{spin}}$  were calculated by the following equation:

$$\chi_{\text{spin}} \propto I_m \times (\Delta \mathbf{B}_{\text{pp}})^2 \quad (1)$$

, where maximum intensity  $I_m$ , the peak-to-peak width  $\Delta \mathbf{B}_{\text{pp}}$ , and resonance center  $\mathbf{B}_0$  were determined by fitting to the equation of Lorentzian as follows.

$$I(B) = a \times \frac{16 \times I_m \times (\mathbf{B}_0 - \mathbf{B}) / (\Delta \mathbf{B}_{\text{pp}} / 2)}{[3 + \{ \frac{\mathbf{B}_0 - \mathbf{B}}{\Delta \mathbf{B}_{\text{pp}}} / 2 \}^2]^2} \quad (2).$$

Spectra of **2S-F<sub>4</sub>** were finely fitted to sum of two Lorentzian curves, and  $I_{m_a}$ ,  $I_{m_b}$ ,  $\Delta \mathbf{B}_{\text{pp}_a}$ ,  $\Delta \mathbf{B}_{\text{pp}_b}$ ,  $\mathbf{B}_{0_a}$ , and  $\mathbf{B}_{0_b}$  were determined by using the equation of Lorentzian in the differential form as follows.

$$I(B) = a \times \frac{16 \times I_{m_a} \times (\mathbf{B}_{0_a} - \mathbf{B}) / (\Delta \mathbf{B}_{\text{pp}_a} / 2)}{[3 + \{ \frac{\mathbf{B}_{0_a} - \mathbf{B}}{\Delta \mathbf{B}_{\text{pp}_a}} / 2 \}^2]^2} + b \times \frac{16 \times I_{m_b} \times (\mathbf{B}_{0_b} - \mathbf{B}) / (\Delta \mathbf{B}_{\text{pp}_b} / 2)}{[3 + \{ \frac{\mathbf{B}_{0_b} - \mathbf{B}}{\Delta \mathbf{B}_{\text{pp}_b}} / 2 \}^2]^2} \quad (3).$$

The determined parameters as a function of temperatures are shown in Fig. 8d,e and Supplementary Fig. 39.

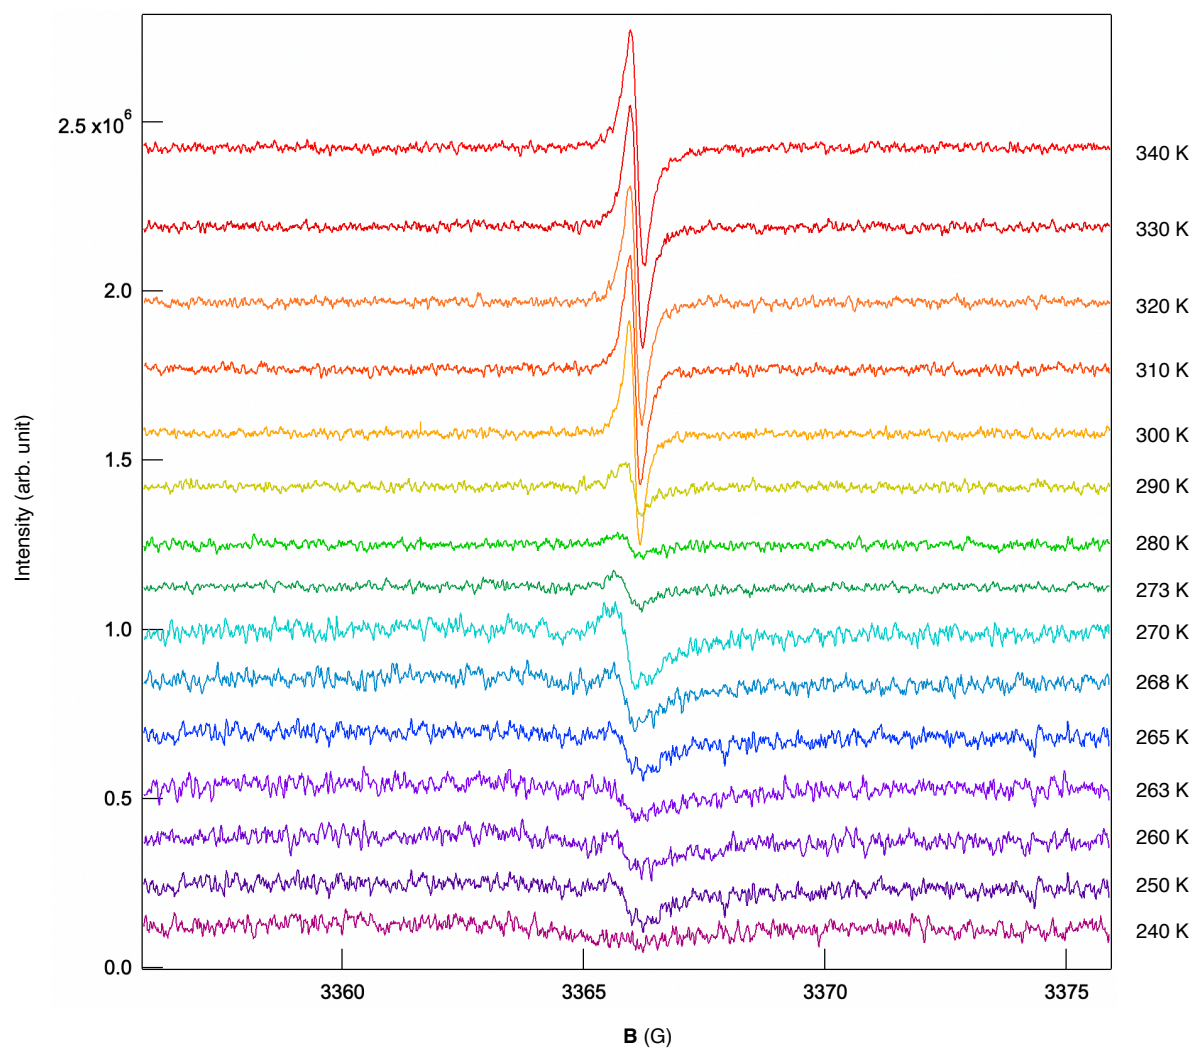

**Supplementary Fig. 37: Temperature-dependent ESR spectra of 2S-F<sub>4</sub>.**

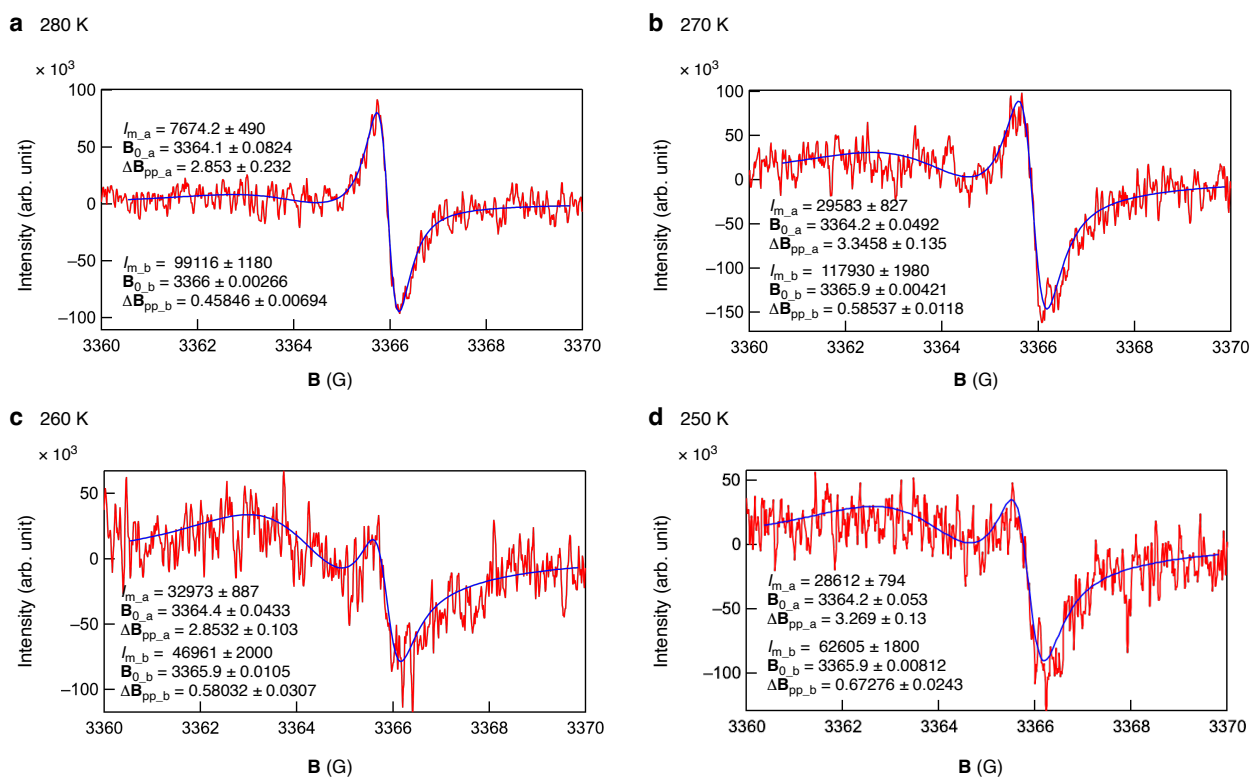

**Supplementary Fig. 38: Enlarged ESR spectra of 2S-F<sub>4</sub>.** **a**, 280 K. **b**, 270 K. **c**, 260 K. **d**, 250 K. Blue lines show fitting curves composed of two Lorentzian curves. The spectrum at 280 K was obtained by accumulating signals for one-fourth of scans of those below 280 K.

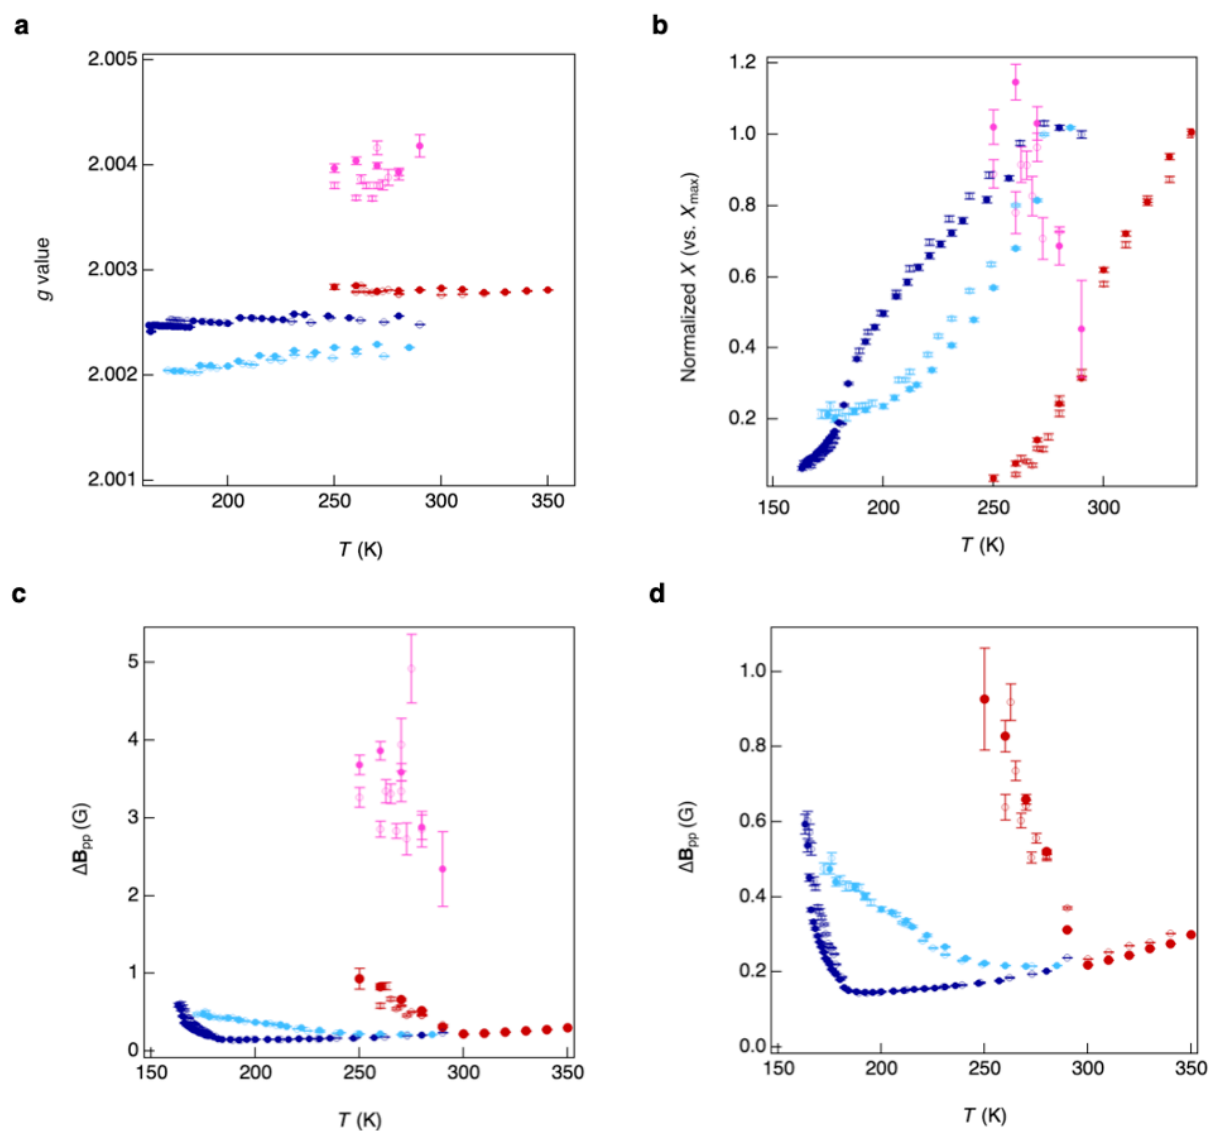

**Supplementary Fig. 39: Parameters for ESR spectra of mixed-stack complexes.** Parameters of  $2O-F_4$  (blue),  $2O-F_2$  (aqua), and major signals for  $2S-F_4$  (red), and minor signals for  $2S-F_4$  (pink) upon the cooling (blank circles) and heating (filled circles) processes. Temperature dependence of  $g$  value (a), normalized  $\chi_{spin}$  (b) relative to the maximum value (for the major signals in  $2S-F_4$ ),  $\Delta B_{pp}$  (c,d) are shown (d: the enlarged chart of c).



## Supplementary Note 11: Static magnetic susceptibility measurements

The static magnetic susceptibility of polycrystals **2O-F<sub>4</sub>** and **2S-F<sub>4</sub>** was measured applying the static magnetic field of 10,000 O<sub>e</sub> (Supplementary Fig. 40). The  $\chi_{\text{exp}}$  values were adjusted by subtracting the value at 100 and 80 K for **2O-F<sub>4</sub>** and **2S-F<sub>4</sub>**, respectively, to be  $2.6 \times 10^{-4}$  and  $1.2 \times 10^{-4}$  emu mol<sup>-1</sup> at 293 K, respectively. The  $\chi$  values were relatively high compared to those of previously reported mixed-stack complexes,<sup>33,34,35</sup> most of which are in nearly nonmagnetic states. These values are comparable to those of typical organic conductors,<sup>22</sup> emphasizing the presence of abundant conductive electrons.

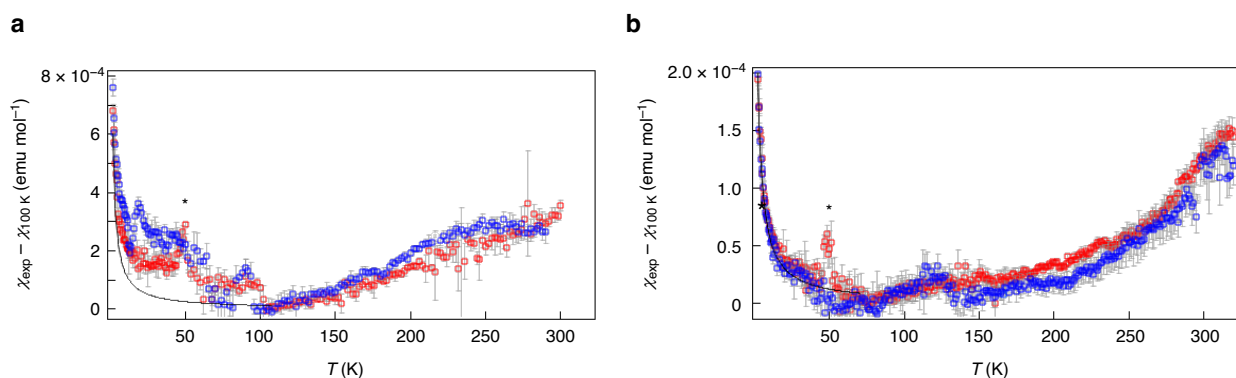

**Supplementary Fig. 40: Temperature-dependent susceptibility of mixed-stack complexes. a, 2O-F<sub>4</sub>. b, 2S-F<sub>4</sub>.** The susceptibility upon the cooling (blue) and heating (red) processes were shown. Black lines are fitting curves of  $\chi_{\text{cw}}$ . Asterisks indicate the anomaly attributed to the presence of molecular oxygen in the sample holder.

## 10. NMR spectra

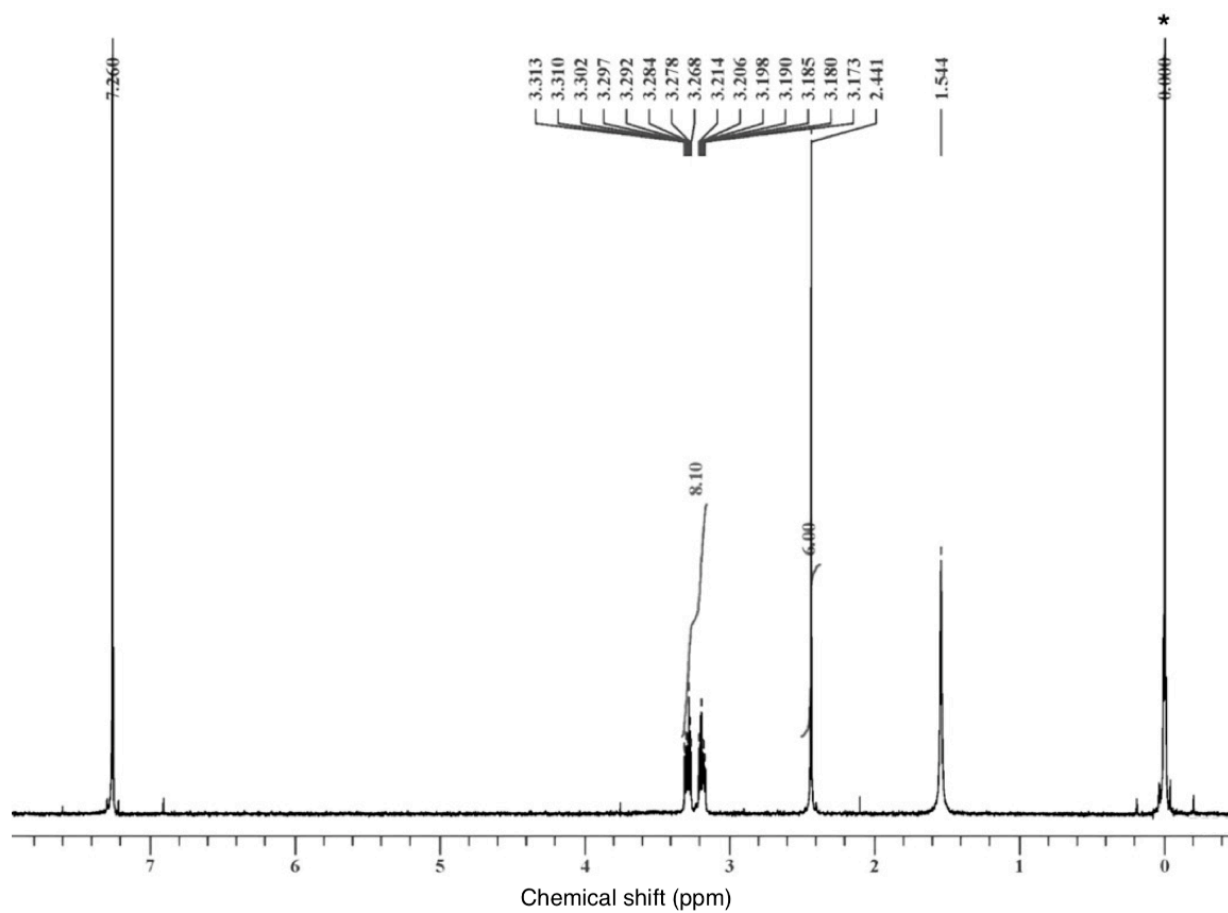

**Supplementary Fig. 41:**  $^1\text{H}$  NMR spectrum of 2S in  $\text{CDCl}_3$ . The signal for  $\text{Si}(\text{CH}_3)_4$  used for the internal standard was shown with an asterisk.

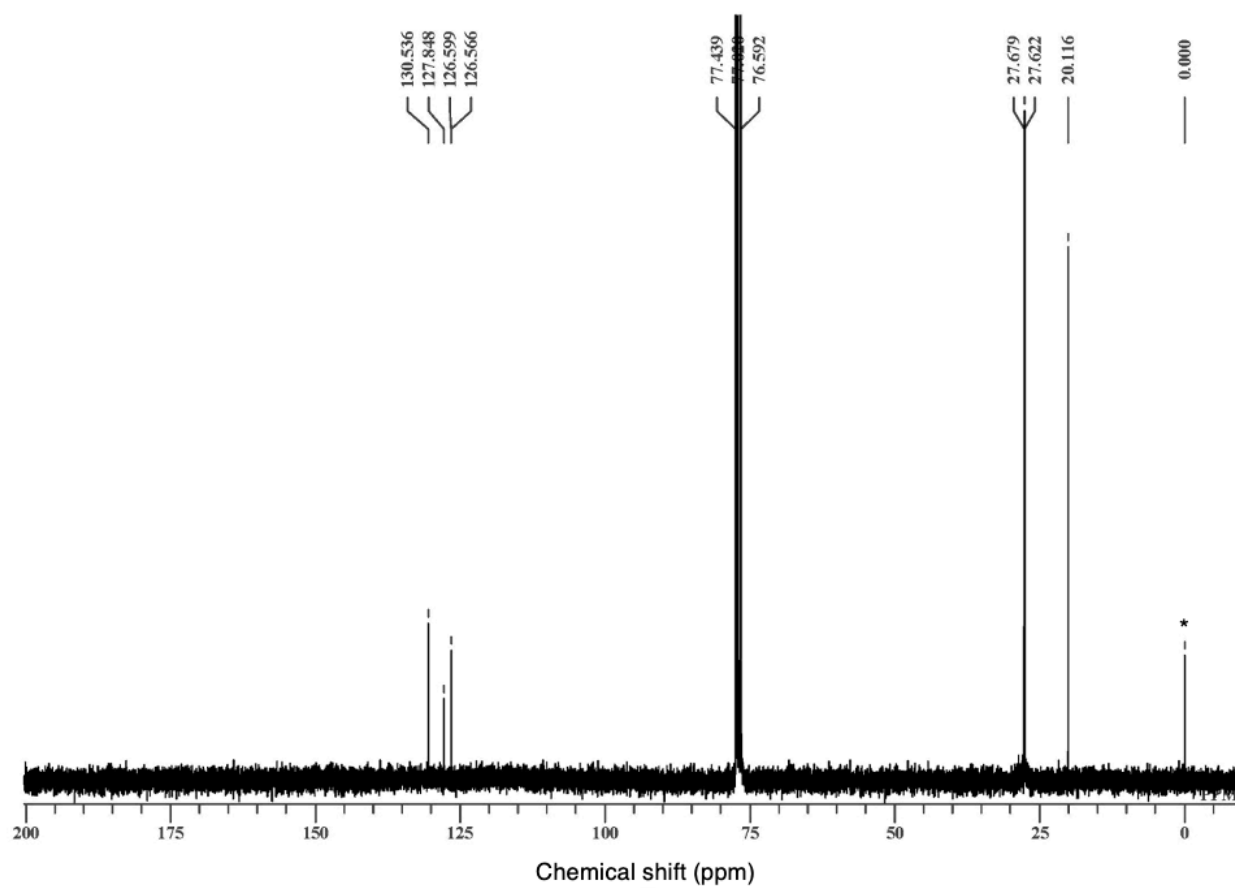

**Supplementary Fig. 42:** <sup>13</sup>C NMR spectrum of 2S in CDCl<sub>3</sub>. The signal for Si(CH<sub>3</sub>)<sub>4</sub> used for the internal standard was shown with an asterisk.

## 11. Coordinates of optimized structures

**Supplementary Table 6: The geometry of optimized structure for neutral 2S.** The calculation was performed by Gaussian (B3LYP, 6-31G+(d)).

|     |        |         |         |
|-----|--------|---------|---------|
| C1  | 4.0228 | 3.9680  | 0.3304  |
| C2  | 3.3195 | 4.8232  | 1.1597  |
| C3  | 4.0070 | 5.0995  | 2.3940  |
| C4  | 1.5071 | 6.8425  | 1.7958  |
| H5  | 2.1672 | 7.6565  | 1.4809  |
| H6  | 0.4703 | 7.1592  | 1.6351  |
| C7  | 1.7233 | 6.4966  | 3.2641  |
| H8  | 1.1056 | 5.6417  | 3.5543  |
| H9  | 1.4497 | 7.3489  | 3.8966  |
| S10 | 5.5429 | 3.5003  | 1.0494  |
| C11 | 3.6193 | 3.4720  | -0.9884 |
| C12 | 2.9108 | 2.3199  | -1.2793 |
| C13 | 2.7076 | 2.1287  | -2.6918 |
| C14 | 1.1432 | 0.2125  | -0.8052 |
| H15 | 0.2373 | 0.8072  | -0.9570 |
| H16 | 0.9173 | -0.5793 | -0.0820 |
| C17 | 1.6243 | -0.4007 | -2.1146 |
| H18 | 2.5635 | -0.9415 | -1.9661 |
| H19 | 0.8782 | -1.1068 | -2.4969 |
| S20 | 4.0452 | 4.3363  | -2.4426 |
| C21 | 3.2539 | 3.1512  | -3.4477 |
| C22 | 5.2348 | 4.4652  | 2.4688  |
| S23 | 3.2481 | 3.3133  | -5.2047 |

|     |        |        |         |
|-----|--------|--------|---------|
| S24 | 6.3920 | 4.5155 | 3.7998  |
| C25 | 7.4047 | 5.9878 | 3.3547  |
| H26 | 7.9108 | 5.8355 | 2.3982  |
| H27 | 6.7876 | 6.8887 | 3.3182  |
| H28 | 8.1524 | 6.0937 | 4.1468  |
| C29 | 1.6442 | 4.1710 | -5.4923 |
| H30 | 1.6335 | 5.1473 | -5.0016 |
| H31 | 1.5625 | 4.3085 | -6.5749 |
| H32 | 0.8079 | 3.5614 | -5.1418 |
| S33 | 1.8056 | 0.8140 | -3.4771 |
| S34 | 2.4308 | 1.2145 | 0.0278  |
| S35 | 1.7043 | 5.3964 | 0.6890  |
| S36 | 3.4778 | 6.1829 | 3.7001  |

**Supplementary Table 7: The geometry of neutral 2S with constrained torsional angle  $|\theta_1|$  (defined in Supplementary Fig. 4a) to be 180°. The calculation was performed by Gaussian (B3LYP, 6-31G+(d)).**

|    |        |        |        |
|----|--------|--------|--------|
| S1 | 1.0635 | 0.8431 | 6.9634 |
| S2 | 1.9869 | 4.6387 | 5.2369 |
| S3 | 2.8445 | 1.8820 | 3.2238 |
| S4 | 0.5690 | 3.6422 | 8.0934 |
| C5 | 1.7841 | 2.9201 | 5.6445 |
| C6 | 1.7652 | 0.6213 | 5.4054 |
| C7 | 2.0674 | 1.8077 | 4.8181 |
| C8 | 1.1864 | 2.6257 | 6.8442 |
| C9 | 2.9367 | 4.6345 | 3.6534 |

|     |        |         |        |
|-----|--------|---------|--------|
| H10 | 2.7960 | 5.6449  | 3.2824 |
| H11 | 3.9884 | 4.4880  | 3.8533 |
| C12 | 2.4110 | 3.5886  | 2.6797 |
| H13 | 2.8926 | 3.6420  | 1.7081 |
| H14 | 1.3423 | 3.6933  | 2.5373 |
| C15 | 2.1132 | 4.0142  | 9.0685 |
| H16 | 2.4853 | 3.0515  | 9.4029 |
| H17 | 1.7587 | 4.5874  | 9.9079 |
| H18 | 2.8517 | 4.5385  | 8.4757 |
| S19 | 2.4713 | -0.4506 | 3.0881 |
| S20 | 1.9784 | -4.6286 | 3.8407 |
| S21 | 1.2525 | -2.6859 | 6.6262 |
| S22 | 2.9219 | -2.8632 | 1.2797 |
| C23 | 2.0043 | -2.8506 | 3.9299 |
| C24 | 1.9355 | -0.6655 | 4.7241 |
| C25 | 1.7679 | -2.0032 | 5.0690 |
| C26 | 2.4075 | -2.2201 | 2.7989 |
| C27 | 1.2691 | -5.1968 | 5.4400 |
| H28 | 1.5268 | -6.2509 | 5.4710 |
| H29 | 0.1921 | -5.1101 | 5.4225 |
| C30 | 1.8708 | -4.4259 | 6.5958 |
| H31 | 1.5415 | -4.8013 | 7.5599 |
| H32 | 2.9539 | -4.4554 | 6.5680 |
| C33 | 1.2843 | -3.0593 | 0.4097 |
| H34 | 0.8564 | -2.0634 | 0.3663 |

|     |        |         |         |
|-----|--------|---------|---------|
| H35 | 1.5556 | -3.3884 | -0.5781 |
| H36 | 0.6253 | -3.7486 | 0.9213  |

**Supplementary Table 8: The geometry of optimized structure for radical cation 2S<sup>+</sup>.** The calculation was performed by Gaussian (UB3LYP, 6-31G+(d)).

|     |        |         |         |
|-----|--------|---------|---------|
| C1  | 3.3129 | 4.2093  | 0.4156  |
| C2  | 3.1834 | 5.5683  | 0.8268  |
| C3  | 3.7039 | 5.8146  | 2.1208  |
| C4  | 2.7418 | 8.3764  | 0.6307  |
| H5  | 3.7485 | 8.7410  | 0.4136  |
| H6  | 2.0189 | 9.0442  | 0.1498  |
| C7  | 2.4913 | 8.3113  | 2.1296  |
| H8  | 1.5000 | 7.9127  | 2.3615  |
| H9  | 2.5696 | 9.3141  | 2.5620  |
| S10 | 4.1595 | 3.2771  | 1.6730  |
| C11 | 2.8214 | 3.5610  | -0.7497 |
| C12 | 3.2276 | 2.3380  | -1.3564 |
| C13 | 2.4205 | 1.9552  | -2.4543 |
| C14 | 4.5446 | -0.1455 | -1.6229 |
| H15 | 3.8059 | -0.7506 | -1.0917 |
| H16 | 5.5347 | -0.5856 | -1.4623 |
| C17 | 4.2379 | -0.0679 | -3.1119 |
| H18 | 4.9560 | 0.5661  | -3.6383 |
| H19 | 4.2750 | -1.0700 | -3.5521 |
| S20 | 1.4157 | 4.2173  | -1.6097 |

|     |         |        |         |
|-----|---------|--------|---------|
| C21 | 1.3942  | 2.8774 | -2.7146 |
| C22 | 4.2467  | 4.6634 | 2.7130  |
| S23 | 0.2532  | 2.7096 | -4.0105 |
| S24 | 4.9255  | 4.6364 | 4.3089  |
| C25 | 5.4977  | 2.9103 | 4.4914  |
| H26 | 4.6603  | 2.2095 | 4.4456  |
| H27 | 6.2561  | 2.6649 | 3.7436  |
| H28 | 5.9483  | 2.8638 | 5.4857  |
| C29 | -0.8077 | 4.1859 | -3.8259 |
| H30 | -0.2290 | 5.1052 | -3.9480 |
| H31 | -1.5384 | 4.1146 | -4.6351 |
| H32 | -1.3335 | 4.1774 | -2.8679 |
| S33 | 2.5296  | 0.4969 | -3.4491 |
| S34 | 4.6876  | 1.5024 | -0.8267 |
| S35 | 2.4723  | 6.7801 | -0.2410 |
| S36 | 3.7814  | 7.3472 | 2.9960  |

**Supplementary Table 9: The geometry of optimized structure for neutral F<sub>4</sub>.** The calculation was performed by Gaussian (B3LYP, 6-31G+(d)).

|    |         |         |        |
|----|---------|---------|--------|
| C1 | -0.9377 | -0.3076 | 1.0919 |
| C2 | 0.5063  | -0.4011 | 1.093  |
| C3 | 1.1799  | 0.8796  | 1.0942 |
| C4 | 0.5152  | 2.0649  | 1.0943 |
| C5 | -0.9288 | 2.1584  | 1.0932 |
| C6 | -1.6024 | 0.8777  | 1.092  |



|     |         |         |        |
|-----|---------|---------|--------|
| C7  | -0.9597 | 4.6449  | 1.0945 |
| N8  | -0.5225 | 5.724   | 1.0954 |
| C9  | -3.0336 | 3.4831  | 1.0922 |
| N10 | -4.1821 | 3.6745  | 1.0914 |
| C11 | 0.5371  | -2.8876 | 1.0917 |
| N12 | 0.0999  | -3.9667 | 1.0908 |
| C13 | 2.6111  | -1.7258 | 1.094  |
| N14 | 3.7595  | -1.9172 | 1.0948 |
| F15 | 1.2301  | 3.191   | 1.0955 |
| F16 | 2.5136  | 0.9022  | 1.0953 |
| F17 | -2.9361 | 0.8551  | 1.0909 |
| F18 | -1.6526 | -1.4337 | 1.0907 |
| C19 | -1.6078 | 3.3699  | 1.0933 |
| C20 | 1.1853  | -1.6126 | 1.0929 |

**Supplementary Table 10: The geometry of optimized structure for radical anion  $F_4^-$ .** The calculation was performed by Gaussian (UB3LYP, 6-31G+(d)).

|    |         |         |        |
|----|---------|---------|--------|
| C1 | -0.9377 | -0.3076 | 1.0919 |
| C2 | 0.5063  | -0.4011 | 1.0930 |
| C3 | 1.1799  | 0.8796  | 1.0942 |
| C4 | 0.5152  | 2.0649  | 1.0943 |
| C5 | -0.9288 | 2.1584  | 1.0932 |
| C6 | -1.6024 | 0.8777  | 1.0920 |
| C7 | -0.9597 | 4.6449  | 1.0945 |
| N8 | -0.5225 | 5.7240  | 1.0954 |

|     |         |         |        |
|-----|---------|---------|--------|
| C9  | -3.0336 | 3.4831  | 1.0922 |
| N10 | -4.1821 | 3.6745  | 1.0914 |
| C11 | 0.5371  | -2.8876 | 1.0917 |
| N12 | 0.0999  | -3.9667 | 1.0908 |
| C13 | 2.6111  | -1.7258 | 1.0940 |
| N14 | 3.7595  | -1.9172 | 1.0948 |
| F15 | 1.2301  | 3.1910  | 1.0955 |
| F16 | 2.5136  | 0.9022  | 1.0953 |
| F17 | -2.9361 | 0.8551  | 1.0909 |
| F18 | -1.6526 | -1.4337 | 1.0907 |
| C19 | -1.6078 | 3.3699  | 1.0933 |
| C20 | 1.1853  | -1.6126 | 1.0929 |

**Supplementary Table 11: The geometry of optimized structure for neutral F<sub>2</sub>.** The calculation was performed by Gaussian (B3LYP, 6-31G+(d)).

|     |         |         |        |
|-----|---------|---------|--------|
| C1  | -0.9176 | -0.3443 | 1.0919 |
| C2  | 0.5256  | -0.3691 | 1.0931 |
| C3  | 1.1716  | 0.9297  | 1.0943 |
| C4  | 0.495   | 2.1015  | 1.0944 |
| C5  | -0.9482 | 2.1263  | 1.0931 |
| C6  | -1.5942 | 0.8275  | 1.0919 |
| C7  | -0.9299 | 4.5682  | 1.0944 |
| N8  | -0.3408 | 5.5727  | 1.0954 |
| C9  | -3.0646 | 3.4636  | 1.092  |
| N10 | -4.2121 | 3.6617  | 1.0911 |

|     |         |         |        |
|-----|---------|---------|--------|
| C11 | 0.5073  | -2.811  | 1.0918 |
| N12 | -0.0818 | -3.8155 | 1.0908 |
| C13 | 2.642   | -1.7064 | 1.0943 |
| N14 | 3.7895  | -1.9045 | 1.0951 |
| F15 | 2.5116  | 0.9545  | 1.0955 |
| F16 | -2.9342 | 0.8027  | 1.0907 |
| C17 | -1.6434 | 3.3289  | 1.0931 |
| C18 | 1.2208  | -1.5716 | 1.0931 |
| H19 | 1.0527  | 3.0318  | 1.0953 |
| H20 | -1.4753 | -1.2746 | 1.0909 |

**Supplementary Table 12: The geometry of optimized structure for radical anion  $F_2^{\cdot-}$ . The calculation was performed by Gaussian (UB3LYP, 6-31G+(d)).**

|     |         |         |        |
|-----|---------|---------|--------|
| C1  | -0.8893 | -0.3368 | 1.0934 |
| C2  | 0.5364  | -0.3736 | 1.0935 |
| C3  | 1.1539  | 0.9091  | 1.0931 |
| C4  | 0.4667  | 2.0941  | 1.0928 |
| C5  | -0.9590 | 2.1308  | 1.0928 |
| C6  | -1.5765 | 0.8481  | 1.0931 |
| C7  | -0.9509 | 4.5932  | 1.0921 |
| N8  | -0.3445 | 5.5940  | 1.0918 |
| C9  | -3.0822 | 3.5076  | 1.0924 |
| N10 | -4.2355 | 3.7027  | 1.0924 |
| C11 | 0.5283  | -2.8360 | 1.0941 |
| N12 | -0.0781 | -3.8368 | 1.0944 |

|     |         |         |        |
|-----|---------|---------|--------|
| C13 | 2.6596  | -1.7504 | 1.0938 |
| N14 | 3.8129  | -1.9454 | 1.0939 |
| F15 | 2.5116  | 0.9692  | 1.0931 |
| F16 | -2.9342 | 0.7880  | 1.0931 |
| C17 | -1.6705 | 3.3705  | 1.0924 |
| C18 | 1.2479  | -1.6133 | 1.0938 |
| H19 | 1.0321  | 3.0201  | 1.0925 |
| H20 | -1.4547 | -1.2629 | 1.0937 |

## 12. Supplementary references

1. Kameyama, R., Fujino, T., Dekura, S., Kawamura, M., Ozaki, T. & Mori, H. The simplest model for doped poly(3,4-ethylenedioxythiophene) (PEDOT): single-crystalline EDOT dimer radical cation salts. *Chem. Eur. J.* **27**, 6696–6700 (2021).
2. Cortizo-Lacalle, D., Howells, C. T., Gambino, S., Vilela, F., Vobecka, Z., Findlay, N. J., Inigo, A. R., Thomson, S. A. J., Skabara, P. J. & Samuel, I. D. W. BODIPY-based conjugated polymers for broadband light sensing and harvesting applications. *J. Mater. Chem. A* **22**, 14119–14126 (2012).
3. Seino, Y., Nakamura, H., Mori, H., Fujino, T., Dekura, S. & Kameyama, R. Conductive oligomer, conductive composition, conductive aid, and condenser electrode, transparent electrode, battery electrode, or capacitor electrode formed using said conductive composition. *WO2020262443*, Publication Date 30/12/2020.
4. Uekusa, T., Sato, R., Yoo, D., Kawamoto, T. & Mori, T. Transistor characteristics of charge-transfer complexes observed across a neutral–ionic transition. *ACS Appl. Mater. Interfaces* **12**, 24174–24183 (2020).
5. Sato, R., Kawamoto, T. & Mori, T. Asymmetrical hole/electron transport in donor–acceptor mixed-stack

- cocrystals. *J. Mater. Chem. C* **7**, 567–577 (2019).
6. Gaussian 09, Revision D.01, Gaussian, Inc., Wallingford CT, 2016. <https://gaussian.com/>.
  7. Becke, A. D. Density-functional exchange-energy approximation with correct asymptotic behavior. *Phys. Rev. A* **38**, 3098–3100 (1988).
  8. Becke, A. D. Density-functional thermochemistry. III. The role of exact exchange. *J. Chem. Phys.* **98**, 5648–5652 (1993).
  9. Lee, C., Yang, W. & Parr R. G. Development of the Colle-Salvetti correlation-energy formula into a functional of the electron density. *Phys. Rev. B* **37**, 785–789 (1988).
  10. Ditchfield, R., Hehre, W. J. & Pople, J. A. Self-consistent molecular-orbital methods. IX. An extended Gaussian-type basis for molecular-orbital studies of organic molecules. *J. Chem. Phys.* **54**, 724–728 (1971).
  11. Hehre, W. J., Ditchfield, R. & Pople, J. A. Self-consistent molecular orbital methods. XII. further extensions of Gaussian-type basis sets for use in molecular orbital studies of organic molecules. *J. Chem. Phys.* **56**, 2257–2261 (1972).
  12. Hariharan, P. C. & Pople, J. A. Accuracy of  $AH_n$  equilibrium geometries by single determinant molecular orbital theory. *Mol. Phys.* **27**, 209–214 (1974).
  13. GaussView 5.0, Version 5.0.8, 2008, Semichem Inc., Shawnee Mission, KS. <https://gaussian.com/>.
  14. Onozuka, K., Fujino, T., Kameyama, R., Dekura, S., Yoshimi, K., Nakamura, T., Miyamoto, T., Yamakawa, T., Okamoto, H., Sato, H., Ozaki, T. & Mori, H. Metallic state of a mixed-sequence oligomer salt that models doped PEDOT family. *J. Am. Chem. Soc.* **145**, 15152–15161 (2023).
  15. Kato, Y., Matsumoto, H. & Mori, T. Absence of HOMO/LUMO Transition in charge-transfer complexes of thienoacenes. *J. Phys. Chem. A* **125**, 146–153 (2021).
  16. Sheldrick, G. M. *SHELXT*- Integrated space-group and crystal-structure determination. *Acta Cryst.* **A71**, 3–8 (2015).
  17. Dolomanov, O. V., Bourhis, L. J., Gildea, R. J., Howard, J. A. K. & Puschmann, H. *OLEX2*: A complete structure solution, refinement and analysis program. *J. Appl. Cryst.* **42**, 339–341 (2009).

18. Sugimoto, K., Ohsumi, H., Aoyagi, S., Nishibori, E., Moriyoshi, C., Kuroiwa, Y., Sawa, H. & Takata, M. Extremely high resolution single crystal diffractometry for orbital resolution using high energy synchrotron radiation at SPring-8. *AIP Conf. Proc.* **1234**, 887–890 (2010).
19. CrysAlisPro, Agilent Technologies Ltd, Yarnton (2014).
20. Petříček, V., Dušek, M. & Palatinus, L. Discontinuous modulation functions and their application for analysis of modulated structures with the computing system JANA2006. *Z. Kristallogr. Cryst. Mater.* **229**, 345–352 (2014).
21. Buron-Le Cointe, M., Lemée-Cailleau, M. H., Cailleau, H., Ravy, S., Bérar, J. F., Rouzière, S., Elkaim, E. & Collet, E. One-dimensional fluctuating nanodomains in the charge-transfer molecular system TTF-CA. *Phys. Rev. Lett.* **96**, 205503 (2006).
22. Kagoshima, S., Nagasawa, H. & Sambongi, T. *One-dimensional conductors*, pp. 48–105 (Springer-Verlag, 1988).
23. Momma, K. & Izumi, F. *VESTA3* for three-dimensional visualization of crystal, volumetric and morphology data. *J. Appl. Cryst.* **44**, 1272–1276 (2011).
24. Castagnetti, N., Masino, M., Rizzoli, C. & Girlando, A. Mixed stack charge transfer crystals: crossing the neutral-ionic borderline by chemical substitution. *Phys. Rev. Mater.* **2**, 024602 (2018).
25. Okamoto, H., Ishige, Y., Tanaka, S., Kishida, H., Iwai, S. & Tokura, Y. Photoinduced phase transition in tetrathiafulvalene-*p*-chloranil observed in femtosecond reflection spectroscopy. *Phys. Rev. B* **70**, 165202 (2004).
26. Rice, M. J. Organic linear conductors as systems for the study of electron-phonon interactions in the organic solid state. *J. Phys. Rev. Lett.* **37**, 36–39 (1976).
27. Girlando, A., Bozio, R., Pecile, C. & Torrance, J. B. Discovery of vibronic effects in the Raman spectra of mixed-stack charge-transfer crystals. *Phys. Rev. B* **26**, 2306–2309 (1982).
28. Painelli, A. & Girlando, A. Electron–molecular vibration (e–mv) coupling in charge-transfer compounds and its consequences on the optical spectra: A theoretical framework. *J. Chem. Phys.* **84**, 5655–5671 (1986).

29. Gaussian 16, Revision B.01, 2016. Gaussian, Inc., Wallingford CT, 2016. <https://gaussian.com/>.
30. Binning Jr. R. C. & Curtiss, L. A. Compact contracted basis sets for third-row atoms: Ga–Kr. *J. Comp. Chem.* **11**, 1206–1216 (1990).
31. Rassolov, V. A., Pople, J. A., Ratner, M. A. & Windus, T. L. 6-31G\* basis set for atoms K through Zn. *J. Chem. Phys.* **109**, 1223–1229 (1998).
32. Rassolov, V. A., Ratner, M. A., Pople, J. A., Redfern, P. C. & Curtiss, L. A. 6-31G\* basis set for third-row atoms. *J. Comp. Chem.* **22**, 976–984 (2001).
33. Mitani, T., Saito, G., Tokura, T. & Koda, T. Soliton formation at the neutral-to-ionic phase transition in the mixed-stack charge-transfer crystal tetrathiafulvalene-*p*-chloranil. *Phys. Rev. Lett.* **53**, 842–845 (1984).
34. Iwasa, Y., Koda, T., Tokura, Y., Kobayashi, A., Iwasawa, N. & Saito, G. Temperature-induced neutral-ionic transition in tetramethylbenzidine-tetracyanoquinodimethane (TMB-TCNQ). *Phys. Rev. B* **42**, 2374–2377 (1990).
35. Kagawa, F., Horiuchi, S., Tokunaga, M., Fujioka, J. & Tokura, Y. Ferroelectricity in a one-dimensional organic quantum magnet. *Nat. Phys.* **6**, 169–172 (2010).
